1 **Dynamics of Spaetzle morphogen shuttling in the *Drosophila***  
2 **embryo shapes pattern**

3

4 Neta Rahimi\*, Inna Averbukh\*, Shari Carmon, Eyal D. Schejter, Naama Barkai& and  
5 Ben-Zion Shilo&#

6 Department of Molecular Genetics, Weizmann Institute of Science, Rehovot 76100,  
7 Israel

8 \* Equal contribution

9 & Corresponding authors

10 # Lead contact

11

12

13 **Abstract**

14 Establishment of morphogen gradients in the early *Drosophila* embryo is challenged by a  
15 diffusible extracellular milieu, and rapid nuclear divisions that occur at the same time. To  
16 understand how a sharp gradient is formed within this dynamic environment, we followed the  
17 generation of graded nuclear Dorsal (DI) protein, the hallmark of pattern formation along the  
18 dorso-ventral axis, in live embryos. We show that a sharp gradient is formed through  
19 extracellular, diffusion-based morphogen shuttling that progresses through several nuclear  
20 divisions. Perturbed shuttling in *wntD* mutant embryos results in a flat activation peak and  
21 aberrant gastrulation. Re-entry of DI into the nuclei at each cycle refines the signaling output,  
22 by guiding graded accumulation of the *T48* transcript that drives patterned gastrulation. We  
23 conclude that diffusion-based ligand shuttling, coupled with dynamic readout, establishes a  
24 refined pattern within the diffusible environment of early embryos.

25

## 26 **Introduction**

27 The crude onset and subsequent refinement of spatial information shapes the future body  
28 pattern of embryos. Morphogens, key instructive elements in this context, are secreted  
29 signaling molecules that induce cells to adapt different fates depending on their concentration.  
30 Establishing a morphogen gradient over a field of naïve cells patterns the cell layer into distinct  
31 domains of gene expression (Green and Sharpe, 2015; Wolpert, 1971). Different strategies to  
32 guide morphogen distribution have been identified. A common option is to produce the  
33 morphogen in a restricted group of cells, giving rise to its graded distribution in the  
34 surrounding cells (Lecuit et al., 1996; Nellen et al., 1996). Notably, in this scenario, the  
35 morphogen-producing cells are distinct from the responding cells.

36 An alternative strategy of morphogen distribution is applicable to situations where the  
37 morphogen is broadly expressed, and the gradient is generated *within* the field of expressing  
38 cells, which also respond to the morphogen. This scenario is applicable to early embryos,  
39 where broad transcriptional domains have been established, but have not yet given rise to the  
40 determination of sufficiently restricted groups of cells, which could provide a local morphogen  
41 source. In such situations, restricting morphogen signaling to a narrow domain becomes a  
42 challenge, as diffusion tends to spread, rather than restrict ligand distribution.

43 Studies in several systems identified the *Shuttling* mechanism as a robust solution to this  
44 challenge (Shilo et al., 2013). Here, a morphogen gradient is established not merely by its  
45 diffusion away from the production source, but through an effective translocation of the  
46 morphogen into the center of the field. This translocation, which is purely diffusion driven, is  
47 mediated by a proximally-produced inhibitor. The resulting gradient is sharp and robust,  
48 displaying limited sensitivity to gene dosages or reaction rate constants. Shuttling provides  
49 robustness by concentrating the morphogen into restricted domain, which allows storing excess  
50 levels in regions of maximal signaling without modifying the resulting cell fates. Such a  
51 shuttling mechanism establishes the bone morphogenetic protein (BMP) morphogen gradient  
52 in the early embryos of *Drosophila* and other insects (Eldar et al., 2002; Lapraz et al., 2009;  
53 Shimmi et al., 2005; van der Zee et al., 2006; Wotton et al., 2017). It is also used for forming

54 the BMP gradient in the *Xenopus* embryo, where it acquired additional features that allow  
55 scaling of the gradient with embryo size (Ben-Zvi et al., 2014; Ben-Zvi et al., 2008).

56 Compelling evidence for shuttling was provided by comparing mutant phenotypes with the  
57 predictions made by computational models (Ben-Zvi et al., 2008; Eldar et al., 2002; Haskel-  
58 Ittah et al., 2012). It was also demonstrated that ligand produced ectopically in one part of the  
59 embryo can be translocated to and endocytosed in the normal activation domain (Reversade  
60 and De Robertis, 2005; Wang and Ferguson, 2005). Experimentally, these data were obtained  
61 through the analysis of fixed embryos. Yet, the essence of the shuttling mechanism resides in  
62 its *dynamics*. What is the time-frame during which the gradient is established? How fast is  
63 gradient formation relative to its readout? Is the gradient stably formed, or is it subject to  
64 subsequent cycles of refinements? Insight into these questions requires monitoring the dynamic  
65 distribution of the morphogen within single embryos.

66 Furthermore, the shuttling mechanism makes a number of counter-intuitive predictions  
67 regarding the dynamics of pattern formation. In particular, it predicts that signaling at the edge  
68 of the source will initially increase, as ligand begins to accumulate, but will subsequently be  
69 reduced, since ligand is continuously being shuttled to the center of the field. This non-  
70 monotonic behavior is a defining property of the shuttling mechanism that concentrates ligand,  
71 but is absent from other diffusion-based mechanisms establishing a graded pattern. In a certain  
72 parameter range, shuttling also predicts transient formation of a double-peak pattern within the  
73 gradient, again a prediction that is absent from naïve gradient-forming mechanisms.  
74 Uncovering such features is again possible only by monitoring the dynamics of gradient  
75 formation in live embryos.

76 The ability to observe the dynamics of morphogen gradient formation is challenging. The  
77 ligands typically function at low levels. Furthermore, the morphogen may be present not only  
78 in its active form, but also in a non-processed, inactive form, or bound to an inhibitor. Finally,  
79 the morphogen is present in both extra- and intra-cellular locations. Most studies therefore  
80 follow the patterning processes by quantifying the intracellular outcome of morphogen  
81 signaling as a proxy for active morphogen distribution, using antibodies against the activated  
82 (e.g, phosphorylated) states of signaling pathways triggered by morphogens (Dorfman and

83 Shilo, 2001; Gabay et al., 1997; Tanimoto et al., 2000). Such approaches, however, cannot be  
84 used to follow live embryos as they rely on immunostaining of fixed samples. An alternative is  
85 to follow the transcriptional outcomes of morphogen signaling, but this analysis is already  
86 quite removed from the original morphogen gradient itself, and is compounded by additional  
87 regulatory inputs controlling the expression of the target genes.

88 Patterning the dorso-ventral (D-V) axis of the *Drosophila* embryo provides a powerful system to  
89 analyze the dynamics of morphogen gradient formation. The early *Drosophila* embryo is a  
90 syncytium, that is, a collection of nuclei that occupy a common cytoplasm enclosed by the  
91 embryonic plasma membrane. Within this syncytium, the nuclei undergo 13 rapid and  
92 synchronous divisions without any change in embryo size or shape. During the final four  
93 division cycles, the nuclei form a monolayer just beneath the plasma membrane. Spatzle (Spz)  
94 is secreted from the syncytium into the surrounding peri-vitelline fluid, positioned between the  
95 plasma and vitelline membranes, and a gradient of active Spz forms within it, along the radial  
96 D-V axis. The processed Spz morphogen binds the transmembrane Toll receptor (DeLotto and  
97 DeLotto, 1998; Morisato and Anderson, 1994; Schneider et al., 1994; Weber et al., 2003), and  
98 triggers Dorsal (Dl) translocation into the syncytial nuclei (Figure 1A). The processed form of  
99 the Spz ligand therefore functions as the morphogen at this stage.

100 We previously showed that graded active Spz distribution is established by a shuttling  
101 mechanism. In this case, shuttling is implemented in a self-organized manner through a  
102 complex interplay between the active ligand and its pro-domain, which can accommodate  
103 diverse structures (Haskel-Ittah et al., 2012; Shilo et al., 2013). The resulting gradient of active  
104 Spz is sharp, and provides robustness to a variety of perturbations in the level of pathway  
105 components.

106 Entry of Dl into the nuclei can be followed in single live embryos carrying a Dl-GFP fused  
107 protein (DeLotto et al., 2007). In this work, we use Light Sheet fluorescence microscopy for  
108 live imaging of Dl-GFP nuclear localization during the final nuclear division cycles of the  
109 syncytial *Drosophila* embryo. The resulting dynamics shows the two signatures of ligand  
110 shuttling: a transient increase in signaling in the lateral regions, which is then reduced so as to  
111 preferentially increase signaling at the ventral midline, and the resolution of two lateral peaks

112 to a single central peak. We find that ligand shuttling is an ongoing process, which repeats  
113 itself following each nuclear division. During the beginning of nuclear cycle (NC) 14, the  
114 resulting dynamics of nuclear re-entry of Dl allows to further refine the resulting spatial  
115 pattern, by triggering different temporal onsets of zygotic target gene expression in closely  
116 positioned nuclei, thereby leading to a functionally significant graded accumulation of target  
117 gene transcripts. In *wntD* mutant embryos, the Dl peak becomes flattened, and leads to an  
118 abnormal increase in the number of cells simultaneously undergoing the initial step of  
119 gastrulation, underscoring the significance of timely and properly shaped gradient formation.  
120 Thus, diffusion-based ligand shuttling, coupled with a dynamic readout, establishes a  
121 refined pattern within the environment of early embryos.

122

## 123 **Results**

### 124 **Temporal evolution of the Spz gradient during nuclear cycles 12-14**

125 Using Light Sheet fluorescence microscopy, we followed individual embryos carrying a Dl-  
126 GFP fusion protein expressed under the endogenous *Dl* promoter (Figure 1B, SI: movie 1).  
127 Consistent with previous reports (DeLotto et al., 2007; Kanodia et al., 2009), we observed a D-  
128 V gradient of nuclear Dl-GFP already at NC 12. This gradient was further refined and  
129 elaborated during the next two cycles. To enable quantitative analysis of Dl-GFP nuclear  
130 dynamics, we used an area preserving transformation to project the 3D images onto a 2D sheet.  
131 We restricted our analysis to a region surrounding the A-P midline, where distortion due to 2D  
132 projection is negligible (Figure 1C, SI: movie 2) (Heemskerk and Streichan, 2015). Next, we  
133 automatically segmented the nuclei and averaged the nuclear Dl-GFP signal in nuclei  
134 occupying a similar D-V axis position.

135 Our measurements defined the quantitative, spatio-temporal dynamics of Dl-GFP at a 1-2  
136 minute time resolution (Figure 1C-D, SI: movie 3, Methods). This dynamics results from the  
137 extracellular active Spz gradient. However, inferring the profile of this extracellular gradient  
138 from Dl-GFP dynamics is confounded by the fact that Dl-nuclear accumulation is established  
139 anew at every nuclear cycle, since Dl exits the nucleus at mitosis upon nuclear envelope

140 breakdown. We therefore needed a framework to suitably infer properties of the extracellular  
141 active Spz gradient, and critically distinguish between models of gradient formation.

142 Toll signaling, at each given position along the D-V gradient, triggers the level of nuclear DI  
143 and the rate by which this level increases. Thus, at the beginning of each division cycle,  
144 following re-establishment of the nuclear envelope, nuclear DI levels increase at a rate that is  
145 proportional to the level of nearby Toll signaling. Conversely, at longer times, nuclear DI  
146 levels approach a steady state, and are proportional to the extracellular Toll signaling. We  
147 therefore plotted the dynamics of both parameters, nuclear DI levels and its temporal change  
148 during the onset of NC 14. Notably, we observe that this qualitative dynamics differs,  
149 depending on the spatial position of nuclei along the D-V axis. In the ventral-most regions they  
150 increased monotonically. In contrast, in lateral domains nuclear DI displayed an overshoot,  
151 initially increasing but then starting to decrease (Figure 2A-D, Figure S1). Clearly, such a  
152 decrease in nuclear DI is only possible if Toll signaling at this position decreases as well.  
153 Therefore, the data indicates that the external Spz gradient continues to evolve through the  
154 early part of NC 14, showing a distinct position-dependent, non-monotonic temporal signature.

155 To more rigorously infer dynamic properties of the external gradient from the measured pattern  
156 of nuclear DI, we used computer simulations, modeling DI-nuclear entry while assuming  
157 different temporal patterns of Toll signaling (Figure 2E-L). Specifically, we searched for a  
158 qualitative signature that distinguishes between three scenarios: (1) constant Toll signaling; (2)  
159 Toll signaling that is changing (increasing) monotonically in time, as expected in naïve  
160 gradient-forming models; and (3) a non-monotonic increase in Toll signaling, the signature  
161 found in lateral regions of gradients formed by the shuttling mechanism. Our simulations have  
162 shown that these scenarios are best distinguished by comparing the temporal changes in  
163 nuclear DI ( $d(DI)/dt$ ) with the levels of nuclear DI. In the first two cases – constant or  
164 monotonically increasing Toll activity – the relation between these two parameters is  
165 invariably linear or concave (Figure 2E-L). In contrast, in the presence of non-monotonic  
166 shuttling-based dynamics, a convex relation is obtained, with a pronounced negative temporal  
167 derivative at the lateral regions, where nuclear DI levels are low (Figure 2M-P).

168 The measured data is not consistent with the dynamic defined by constant, or monotonically  
169 increasing Toll signaling. Rather, it shows a clear signature of non-monotonic, shuttling-like  
170 dynamics. Extending our simulations to include the full shuttling model that establishes the  
171 active Spz gradient combined with DI nuclear transport (See SI), confirmed that this model is  
172 fully capable of simulating the experimentally observed dynamics, including the non-  
173 monotonic, overshoot dynamics at the lateral regions.

174 An additional notable property of DI-nuclear entry dynamics was the initial formation, at every  
175 nuclear cycle, of two ventro-lateral signaling peaks, that eventually converge to a single ventral  
176 peak (Figures 1D, 2A, Figure S1). Thus, by 10-15 minutes into NC 14, when the major target  
177 genes for DI are induced, the initial two-peak gradient has refined to a single sharp peak. The  
178 initial two-peak pattern provides another unique signature of shuttling-like dynamics. It is  
179 expected under certain shuttling parameters, when the mean distance traveled by the shuttling  
180 complex before it is cleaved, is much smaller than the distance to the ventral-most site. In this  
181 case, ligand will initially accumulate at lateral regions, followed by gradual ventral  
182 translocation (See SI). The reappearance of the double peak at every nuclear cycle likely  
183 reflects a process of extracellular ligand mixing in the peri-vitelline fluid, possibly caused by  
184 reorganization of the cortical actin-based cytoskeleton and deformation of the plasma  
185 membrane associated with the nuclear divisions (di Pietro and Bellaiche, 2018; Zhang et al.,  
186 2018).

187 In conclusion, the dynamic behavior of DI-GFP supports a continuous process of extracellular  
188 Spz shuttling, displaying two of its defining signatures: non-monotonic dynamics of nuclear DI  
189 entry in lateral regions, and the transient formation of two-peak gradient.

## 190 **Altered shuttling dynamics in *wntD* mutants affects gastrulation**

191 DI-nuclear localization dynamics can be used for refined analysis of informative mutant  
192 phenotypes. We applied this approach to study WntD, an inhibitor of Toll signaling which  
193 provides a negative feedback that buffers the D-V patterning gradient against fluctuations  
194 (Rahimi et al., 2016). *wntD*, a target of the Toll pathway, is transcribed locally at the posterior



195 terminus of the embryo, and the secreted protein diffuses within the peri-vitelline fluid to  
196 attenuate Toll signaling (Figure 3A)(Helman et al., 2012).

197 Genetic epistasis experiments have demonstrated that WntD binds the Frizzled-4 (Fz4)  
198 receptor, and associates with the extracellular domain of Toll (Rahimi et al., 2016)(Figure 3B).  
199 However, the consequences of this inhibition on gradient formation remained unclear. One  
200 option is that WntD uniformly decreases signaling in all regions. Alternatively, with the  
201 shuttling mechanism in mind, our simulations suggested that the binding of WntD to the  
202 extracellular domain of Toll promotes ligand shuttling. This is because the binding of WntD to  
203 the Toll receptor decreases the number of available receptors. This, in turn, compromises the  
204 ability of free Spz to bind Toll, thereby increasing the probability that it will bind the free  
205 shuttling molecule. Binding of Spz to Toll will thus be directed to more ventral regions, where  
206 the levels of the shuttling molecules are sufficiently low. Uniform distribution of moderate  
207 WntD levels would therefore lead to redistribution of the ligand to more ventral regions,  
208 impacting not only on the strength of Toll signaling, but also on its sharpness (see Figure 3C,F  
209 for simulation results).

210 Using live imaging in a *wntD* mutant background, we directly tested the possibility that WntD  
211 promotes shuttling. Indeed, in *wntD* mutant embryos shuttling was less efficient. First, the  
212 initial signature of a double peak was more prominent and persistent. Second, in contrast to *wt*  
213 embryos where gradual sharpening of the gradient takes place, in a *wntD*-mutant background  
214 the final gradient was relatively wide and displayed a flattened single peak (Figures 3C-J, S2)  
215 – consistent with the predicted role of WntD in redistribution of the Spz ligand (Figure 3K-L).

216 To follow the morphological consequences of a wider peak distribution of nuclear Dl  
217 distribution, we monitored *wntD* mutant embryos for an extended period of NC 14, observing  
218 the processes of gastrulation and ventral furrow formation. We defined the edges of the  
219 furrowing domain by marking the two lateral-most nuclei that alter their orientation upon  
220 gastrulation. Working backwards to an earlier phase of NC 14, when the nuclei are still in a  
221 monolayer, we can accurately count the number of nuclei between these edges. In contrast to  
222 gastrulating *wt* embryos where the initial invagination is observed in ~9 cells, in *wntD* mutants  
223 a broader front of up to 15 cells invaginated at the same time (Figure 4). Thus, the shape of the



224 Dl-activation gradient is essential for normal patterning and gastrulation. When the final  
225 gradient peak is not sharp, a larger cohort of ventral cells takes part in furrow formation.

### 226 **Timing of *wntD* transcription**

227 *wntD* mutants display perturbed Dl dynamics already at NC 13 (Figures 3H, S3) suggesting  
228 that WntD normally exerts its modulating effects at this early stage. This implies that zygotic  
229 expression of *wntD*, its translation, secretion to the peri-vitelline fluid and diffusion of the  
230 protein, have commenced by then. To examine that this is possible, we applied our Light  
231 Sheet-based visualization setup as a more sensitive assay for defining the onset and temporal  
232 dynamics of *wntD* expression.

233 *wntD* expression is activated by nuclear Dl, and is restricted to the posterior region, where  
234 Torso signaling relieves Capicua (Cic) repression (Helman et al., 2012). We generated a  
235 *wntD*::MS2 reporter, utilizing the genomic upstream regulatory sequence of *wntD* (Figure 5A).  
236 The early expression profile of the reporter at the posterior part of the embryo mimics the  
237 known pattern of *wntD* (Rahimi et al., 2016). Importantly, all eight embryos examined  
238 expressed *wntD*, implying that overshooting of Toll signaling, which triggers expression of the  
239 WntD “buffer”, is a common consequence of D-V gradient signaling. When monitoring the  
240 dynamics of *wntD* expression, the number of active nuclei transcribing *wntD* decreased  
241 continuously between NCs 12 and 14 (Figure 5B-F). These results suggest that the WntD  
242 protein already exerts its attenuating effect on Toll signaling at an early time.

### 243 **Dl nuclear re-entry promotes graded expression of the zygotic *T48* gene by different** 244 **temporal onsets of transcription**

245 The gradient of Dl-nuclear localization defines three major domains of zygotic gene expression  
246 along the D-V axis. Within each of these domains several target genes are uniformly  
247 expressed. The mesoderm is defined by highest levels of nuclear Dl and uniform expression of  
248 the zygotic target genes *twist* (*twi*) and *snail* (*sna*) (Rusch and Levine, 1996). However, a  
249 graded zygotic response within the mesoderm is also required: A gradient of apical myosin II  
250 recruitment, peaking at the ventral midline, is essential for the ordered apical cell constriction  
251 driving ventral furrow formation (Heer et al., 2017). A zygotic target gene that may lead to

252 graded myosin II distribution is *T48*, since the T48 protein recruits Rho GEF2 to the apical  
253 membrane, triggering the accumulation and contractile activity of an apical actomyosin  
254 network (Kolsch et al., 2007). We asked whether the dynamics of DI-nuclear entry may play a  
255 role in generating a graded transcriptional response within this region, by following the zygotic  
256 target gene *T48*.

257 Previous analysis of an MS2 reporter for *T48* transcription demonstrated that the ventral-most  
258 nuclei initiate transcription earlier than the lateral ones (Lim et al., 2017). Using the same  
259 reporter, we find that signal intensity in transcribing nuclei is similar regardless of their  
260 position along the D-V axis, suggesting that once *T48* transcription is initiated, it progresses at  
261 a constant rate in all nuclei (Figure 6C). If zygotic expression of DI-target genes depends not  
262 only on the final, steady-state level of nuclear DI, but also on the dynamic profile of its  
263 accumulation, the signaling output could be further sharpened. A dynamic phase of DI nuclear  
264 entry takes place during the initial 20 minutes of NC 14 (Figure 1D), the nuclear cycle  
265 associated with a major onset of zygotic gene expression. A consequence of these dynamics is  
266 that ventral-most nuclei will reach the threshold for expression of a given zygotic gene earlier  
267 than more lateral ones. These ventral nuclei will begin to express the gene earlier, therefore  
268 expressing it for a longer period than more lateral nuclei, and could thus accumulate more  
269 transcripts.

270 To examine the consequences of the graded onset of *T48* transcription on mRNA  
271 accumulation, we carried out quantitative single-molecule FISH using *T48* probes. The signal  
272 obtained is comprised of two components: Prominent puncta in the nuclei representing active  
273 transcription of the gene, and sparse weaker spots in the cytoplasm marking accumulated  
274 individual mRNA molecules. We analyzed embryos that demonstrated ongoing transcription in  
275 several nuclear rows along the D-V axis. The number of transcribing nuclei in ventral and  
276 lateral positions within the expression domain was similar, and the transcription intensity in the  
277 different rows appears comparable. This again indicates that once *T48* transcription is initiated,  
278 it progresses at a constant rate in all nuclei, regardless of position (Figure 6D-E). We next  
279 quantitated the levels of cytoplasmic *T48* mRNA, using the TransQuant (Bahar Halpern and  
280 Itzkovitz, 2016). A clear D-V gradient of cytoplasmic mRNA accumulation is observed across  
281 several cell rows, peaking at the ventral midline (Figure 6F-G). This result indicates that the

282 *T48* mRNA is sufficiently stable during the temporal window of early NC 14, such that the  
283 time of onset of its transcription along the D-V axis, governed by the dynamics of DI nuclear  
284 entry, correlates with the level of mRNA that accumulates in the adjacent cytoplasm. DI  
285 nuclear entry dynamics thus appear to be a critical factor regulating graded *T48* activity along  
286 the D-V axis.

## 287 **Discussion**

### 288 **Dynamics of the Spz extracellular morphogen gradient**

289 The early *Drosophila* embryo provides extreme challenges for the generation and maintenance  
290 of extracellular morphogen gradients. Most notably, the peri-vitelline fluid surrounding the  
291 embryo facilitates rapid diffusion of molecules (Stein et al., 1991). In addition, the alteration in  
292 the surface of the plasma membrane at every nuclear division provides an active mixing force  
293 (di Pietro and Bellaiche, 2018; Zhang et al., 2018). Thus, analysis of the early morphogen  
294 gradients operating in this environment, including ventral Spz/Toll activation and the  
295 subsequent BMP gradient patterning the dorsal aspect, should consider this highly dynamic  
296 environment. In the case of the Toll pathway, the active Spz ligand is generated by proteolytic  
297 processing within the extra-embryonic peri-vitelline fluid in a broad ventral region, defined by  
298 the activation domain of the Easter (Ea) protease (Cho et al., 2012). The generation of a sharp  
299 Spz activation gradient within this broad ventral domain of processing takes place by  
300 diffusion-based shuttling. Our previous work demonstrated that the pro-domain of Spz plays an  
301 instructive role in delivering the active, cleaved ligand towards the ventral midline (Haskel-  
302 Ittah et al., 2012). While a variety of experiments and computational analyses indicated the  
303 utilization of a “self-organized shuttling” mechanism in this context, it was imperative to  
304 visualize the actual dynamics of the process.

305 We were able to infer the dynamics of the extracellular Spz gradient by following the kinetics  
306 of DI-GFP nuclear accumulation in individual live embryos during the final syncytial nuclear  
307 division cycles and the early phase of NC 14. Nuclear levels of DI are not a direct readout of  
308 the extracellular gradient, since accumulation of DI in the nuclei is re-initiated at the onset of  
309 every nuclear cycle. Nevertheless, it is possible to infer key features of the extracellular Spz

310 gradient from this dynamic behavior. Using this approach we identified clear hallmarks of  
311 ligand shuttling, most notably the lateral overshoot and the presence of two lateral peaks which  
312 converge to a central ventral peak. This convergence takes place within a timeframe of  
313 minutes, and repeats at every nuclear cycle. Since new protein molecules of the extracellular  
314 components are continually translated, the ongoing activity of the shuttling process is vital.  
315 Therefore, shuttling is important not only for generating the gradient, but also for maintaining  
316 it, in the face of rapid diffusion and mixing within the peri-vitelline fluid. Importantly, by ~10-  
317 15 minutes into NC 14, when the robust induction of transcription of the cardinal zygotic Dl-  
318 target genes *twt* and *sna* ensues, the nuclear gradient of Dl is sharp and a single ventral peak is  
319 resolved.

### 320 **The role of WntD in shaping and buffering the Spz gradient**

321 Having described the dynamics of Dl-nuclear entry and gradient formation, we were in a  
322 position to use our experimental approach in order to examine regulatory processes affecting  
323 Toll signaling. The Wnt family ligand WntD provides an essential buffering system to  
324 variations in Toll signaling between embryos (Rahimi et al., 2016). *wntD* is an early zygotic  
325 gene that is expressed initially at the posterior-ventral region of the embryo, and its expression  
326 levels depend on the magnitude of Toll signaling (Helman et al., 2012). Although WntD is  
327 produced locally, the rapid secretion and diffusion of the protein in the peri-vitelline space  
328 generates a uniform attenuation of Toll signaling throughout the embryo surface. The activity  
329 of WntD leads in different embryos to convergence of the variable global Toll activation  
330 gradient to a similar pattern, which is dictated by the fixed final signaling level that shuts off  
331 *wntD* expression (Rahimi et al., 2016). We term this paradigm “distal pinning”, achieved in  
332 this case by an induction-contraction mechanism (Shilo and Barkai, 2017).

333 Secreted WntD is recruited to the plasma membrane by binding to its receptor Fz4. Epistasis  
334 assays have indicated that WntD exerts its inhibitory effect on Toll signaling by associating  
335 with the extracellular domain of Toll (Rahimi et al., 2016), thereby reducing the number of  
336 Toll receptors that are available for binding Spz. Bearing the cardinal features of shuttling in  
337 mind, this mode of inhibition implies that the effect of WntD would be global and non-

338 autonomous, and will actually change the shape of the gradient, making it sharper. The  
339 observed dynamics of DI-GFP in *wntD* mutant embryos indeed confirms this prediction.

340 The shuttling process is driven by competition between the inhibitory Spz pro-domain and the  
341 Toll receptor for binding free, active Spz. Binding to the pro-domain is favored in the lateral  
342 part of the embryo, where its concentration is higher, while in more ventral regions binding to  
343 Toll takes over. Since WntD impinges on the extracellular properties of the Toll receptor, the  
344 active ligand is deposited in more ventral regions, where the concentration of the pro-domain is  
345 lower. Thus, WntD does not simply reduce the overall profile of Toll activation, but actually  
346 *re-directs* the ligand from the lateral regions to the ventral domain. We have previously shown  
347 that accumulation of excess ligand in the peak by shuttling is an effective mechanism to buffer  
348 noise. Since activation in this region is already maximal, the excess ligand will not alter the  
349 resulting cell fates (Barkai and Shilo, 2009).

350 The rapid timing of processes in the early embryo and the short duration of interphases  
351 between nuclear divisions raises the question of whether it is actually possible to produce  
352 sufficient levels of WntD that will drive the morphogen profile to the desired equilibrium.  
353 When monitoring *wntD* transcription directly utilizing the MS2 system, we saw that most, if  
354 not all embryos express *wntD*, indicating that Toll signaling overshoots in most embryos.  
355 Furthermore, within single embryos the number of nuclei expressing *wntD* was reduced  
356 between NCs 12 and 13, and completely terminated by NC 14, implying that WntD impinges  
357 on the Toll gradient and its own expression by this time. The intronless arrangement of the  
358 *wntD* gene and the rapid secretion of the protein, which does not require post-translational  
359 modifications (Herr et al., 2012), may facilitate the process.

### 360 **DI nuclear re-entry refines its signaling output**

361 The ventral cohort of zygotic target genes including *twi* and *sna* is induced by the Toll  
362 activation gradient, and the threshold for their induction corresponds to ~50% of maximal DI-  
363 nuclear localization (Kanodia et al., 2009; Liberman et al., 2009). Within the ventral domain,  
364 nuclei exhibit a similar level of *sna* transcription (Bothma et al., 2015; Lagha et al., 2013).

365 These genes are triggered at NC 14 after the D-I gradient is stabilized and a distinct activation  
366 peak generated.

367 Are there zygotic target genes that respond to the dynamics of D-I nuclear targeting, before it  
368 stabilizes? This appears to be the case for *T48*, which encodes a transmembrane protein that  
369 facilitates recruitment of RhoGEF2 and ultimately Rho and actomyosin, to mediate apical  
370 constriction of invaginating mesodermal cells (Kolsch et al., 2007). Graded distribution of  
371 myosin II was shown to be critical for proper invagination of these cells to form the ventral  
372 furrow (Heer et al., 2017).

373 We provide evidence that the graded distribution of *T48* mRNA results from the dynamics of  
374 D-I-nuclear re-entry at NC 14. The ventral-most cells reach the threshold of *T48* induction  
375 earlier than more lateral cells, and hence will express the gene longer (Lim et al., 2017).  
376 Integration of the length of expression along the D-V axis then leads to a gradient of  
377 cytoplasmic *T48* mRNA accumulation. This example represents a unique case, where graded  
378 morphogen activation instructs the generation of a gradient of target-gene expression. The  
379 strict dependence on the *timing* of transcription initiation provides another mechanism to  
380 generate differences between adjacent nuclei along the D-V axis.

381 In conclusion, this work has utilized live imaging of Toll pathway activation, to identify and  
382 characterize the hallmarks of ligand shuttling (Figure 7). This process is rapid and takes place  
383 continuously throughout the final nuclear division cycles, to generate and maintain a sharp  
384 activation gradient in the diffusible environment of the peri-vitelline fluid. WntD impinges on  
385 Spz shuttling, and is responsible not only for buffering variability between embryos, but also  
386 for generating a sharp activation peak. This peak is utilized to induce a graded expression of a  
387 zygotic target gene that is essential for executing processes that drive gastrulation. Thus,  
388 diffusion-based ligand shuttling, coupled with a dynamic readout, establishes a refined pattern  
389 within the environment of early embryos.

390

391

392



## 393 **Acknowledgements**

394 We thank B. Lim and M. Levine for the *T48::MS2* flies, and S. Itskovitz for advice on single-  
395 molecule FISH. We are grateful to Y. Addadi and O. Golani for help in acquisition and  
396 analysis of Light Sheet images, and S. Streichan for support in 3D image processing. Imaging  
397 using the Light Sheet microscope was made possible thanks to The de Picciotto-Lesser Cell  
398 Observatory in memory of Wolf and Ruth Lesser. We thank the members of the Shilo and  
399 Barkai labs for fruitful discussions. The work was supported by an ERC advanced grant to  
400 N.B. and a US-Israel Binational grant to E.S. and B.S. B.S. is an incumbent of the Hilda and  
401 Cecil Lewis chair in Molecular Genetics.

402

## 403 **Methods**

### 404 **Fly stocks and genetics**

405 For the *wt* dlGFP experiments we used *Sco/Cyo;dl-GFP/Tm3, Sb* flies (DeLotto et al., 2007).  
406 For the *wntD* mutant background, a recombination between a *wntD* null allele (Rahimi et al.,  
407 2016) and *dl-GFP* was carried out, and crossed to *wntD* mutant.

408 *wntD::MS2-Fhos-RH* generation: the 1162 bp upstream of *wntD* transcription start site were  
409 synthesized followed by 24 repeats of the MS2 sequence, and placed within the 5UTR. The  
410 sequence was inserted into a pAttB vector with *NotI* and *KpnI* sites. The *Fhos-RH* sequence  
411 was further ligated into the *NotI* site to generate *wntD::MS2-Fhos-RH*. Virgin females  
412 expressing both MCP::GFP and His:RFP were crossed with males of the reporter line  
413 *wntD::MS2-Fhos-RH* to collect embryos for imaging.

414 MCP::GFP and *t4::MS2-yellow* fly lines (Lim et al., 2017) used in the quantitative live imaging  
415 of *T48* induction were kindly provided by B. Lim. Virgin females carrying both MCP::GFP  
416 and His:RFP were crossed with males of the reporter line *T48::MS2-yellow* and embryos  
417 collected for imaging.

418



## 419 **Live Imaging**

420 Embryos were imaged using a Light Sheet z1 microscope (Zeiss Ltd.) equipped with 2 sCMOS  
421 cameras PCO-Edge, 10X excitation objectives and Light Sheet Z.1 detection optics 20×/1.0  
422 (water immersion). The embryos were collected, dechorionated and up to 4 embryos were  
423 sequentially mounted perpendicularly into a glass capillary (Brand) in a 1% low melting  
424 agarose solution (Roth). Imaging was performed using dual side illumination, zoom X0.8. GFP  
425 Excitation: 488nm Emission / detection - BP 505-545, RFP Excitation: 561nm Emission /  
426 detection - BP 575-615.

427 The *T48::MS2* expressing embryos were mounted on a cover slide and imaged through  
428 halocarbon oil in a Zeiss LSM710 confocal system at a temporal resolution of 3 minutes.

## 429 **MS2 analysis**

430 MCP-GFP spots were manually counted using the Imaris software after adjusting the contrast  
431 min&max for enhanced visualization. In the *T48::MS2* analysis the spots were manually  
432 detected and displayed using the Imaris spots object.

## 433 **sm-FISH**

434 Stellaris RNA FISH probe sets for the *T48* gene (5' UTR and coding, not including the 3'  
435 UTR), were designed by Stellaris Probe Designer and purchased from LGC Biosearch  
436 Technologies. 3 hrs after egg lay (AEL) *wt* embryos were fixed for 25 min in 4%  
437 formaldehyde, washed in Methanol and kept at -20°C. Next day embryos were washed in  
438 Methanol and then in Ethanol, rocked in 90% Xylene, 10% Ethanol for 1 hr followed by post  
439 fixation. Then incubated 6' with Proteinase K and post fixed again. Embryos were transferred  
440 gradually to 10% FA in 2X SSC + 10 µg/ml ssDNA preheated to 37°C and prehybridized for  
441 30' at 37°C. Hybridization Buffer included 10% FA, 10% Dextran, 2mg/ml BSA, RVC and  
442 ssDNA+ tRNA in 2X SSC, containing the probe set (1 ng/µl) (Trcek et al., 2017).  
443 Hybridization was carried out O/N at 37°C. Next morning the embryos were shaken gently and  
444 incubated for another 30'. Embryos were washed twice for 30' at 37°C with 10% FA in 2X  
445 SSC + 10 µg/ml ssDNA and gradually transferred to PBS-0.5% Tween and mounted with  
446 Vectashield+DAPI Mounting Medium (Vector Laboratories Inc.). Fluorescence was visualized

447 with a Nikon Eclipse Ti2 microscope, and analyzed by the TransQuant script as was previously  
448 published (Bahar Halpern and Itzkovitz, 2016). TS Intensities were measured via ImageJ.

#### 449 **Light Sheet movies analysis**

#### 450 **Projection to 2D**

451 To enable quantitative analysis of the nuclear D1 gradient, we projected the 3D scans of the  
452 embryo from the light-sheet microscope, into a 2D flat surface, for every time point imaged.  
453 This was possible, since all the nuclei are arranged on the surface of the embryo, whose shape  
454 resembles an ellipsoid. This ellipsoid can be projected into a 2D surface, which contains all the  
455 nuclei and therefore the entire nuclear D1 gradient. To this end, we used an area preserving  
456 transformation with minimal distortion far from the Anterior and Posterior poles, implemented  
457 by the IMSANE tissue cartography tool (Heemskerk and Streichan, 2015). IMSANE was used  
458 with the following specifications: Planar Illastik surface detector and cylinder chart type.  
459 Surface detection was performed on the last time point for each embryo, and the detected  
460 surface was then used to project all earlier time points. Since the embryo is, to a good  
461 approximation, a cylinder apart from the anterior and posterior poles, embryo circumference  
462 was defined as the largest circumference of the ellipsoid fitted to the embryo surface by  
463 IMSANE.

#### 464 **Nuclei segmentation**

465 The nuclei were detected separately for each time point, using the following segmentation  
466 method:

- 467 1. Automated local thresholding of the image in order to create a binary mask. Done  
468 in ImageJ using the Bernsen algorithm with a contrast threshold of 15.
- 469 2. The resulting binary mask underwent further refinement to segment the nuclei  
470 using MATLAB image analysis filters:
  - 471 a. All connected objects in the mask large enough to be nuclei (over 50  
472 pixels in size) were located and classified into 3 size groups: *small* 50-150  
473 pixels, *medium* 150-600 pixels and *large* 600 pixels and over.
  - 474 b. Each size group underwent erosion using *imerode* and then dilation using  
475 *imdilate* with appropriate filter sizes for each group.

- 476 c. Objects belonging to the *large* group underwent another round of erosion  
477 and dilation with same filter size as first round.
- 478 3. The resulting objects in the binary mask were filtered by size to exclude objects  
479 too small (under 50 pixels) or too large (over 3000 pixels) to be a single nucleus.
- 480 4. Nuclei locations were detected by overlaying the mask on the original image.

#### 481 **Measuring the nuclear DI gradient around the A-P midline**

482 Gradient measurement was performed by first manually discarding all time points between the  
483 nuclear cycles. Then, for every detected nucleus, for all remaining time points, the value of  
484 nuclear DI was calculated as the mean intensity inside the nucleus (located by the above  
485 segmentation method). The location of the A-P midline was manually selected for each  
486 embryo. A rectangular area around the A-P midline was then defined. The width of the area  
487 along the A-P axis was 15% of entire A-P length and it spanned the entire D-V axis. For NC14,  
488 this definition corresponds to ~8- 10 columns of nuclei closest to the A-P midline. Only the  
489 nuclei inside this area were taken into account for gradient measurement, monitoring several  
490 columns of nuclei along the A-P axis gave rise to averaging of DI-nuclear intensity along this  
491 small window. The spatial axis for the gradient was defined as a relative axis-  $x/L$ , indicating  
492 location on the D-V axis-  $x$  divided by embryo circumference-  $L$ . In order to assign a location  
493 on this relative D-V axis for each nucleus, the location of the D-V midline was manually  
494 selected and defined as  $x/L = 0$ . This resulted in the raw intensity function,  $Dl_{raw}(x/L, t)$   
495 measuring nuclei intensity along the relative D-V axis, over time. This function,  $Dl_{raw}(x/L, t)$ ,  
496 was then smoothed **in space, for each time point separately** using the MATLAB *smooth*  
497 function with a smoothing coefficient of 0.23. The smoothed data was then fitted by a  
498 smoothing spline using the MATLAB *fit* function and evaluated on a 1000 linearly spaced  
499  $x/L$  locations. The resulting function,  $Dl_{smooth}(x/L, t)$ , was plotted in main text figures.

#### 500 **Dorsal gradient as a function of time, at specific locations along the D-V axis**

501 For the calculation of DI-nuclear intensity over time at a specific location  $\tilde{x}/L$ , we used  
502  $Dl_{smooth}(x/L, t)$  at that location:  $Dl_{smooth}(\tilde{x}/L, t)$ . Background subtracted values were  
503 calculated separately for each NC, by subtracting the minimal intensity observed in a nucleus  
504 for that NC.  $Dl_{smooth}(\tilde{x}/L, t)$  was then smoothed in time using the MATLAB *smooth*

505 function with the *loess* method and a smoothing coefficient of 0.5. It was then fitted with a  
506 smoothing spline, resulting in the function  $Dl_{\tilde{x}/L}^{fitted}(t)$ . The temporal derivative of nuclear  
507 Dorsal, at a specific location-  $\tilde{x}/L$  was calculated by applying a third order finite differences  
508 formula to  $Dl_{\tilde{x}/L}^{fitted}(t)$  and then smoothing using *smooth* with a smoothing coefficient of 0.6  
509 and fitting a smoothing spline.

### 510 **Measuring peak sharpness**

511 The peak sharpness measure for an embryo was calculated based on the values of  $Dl_{smooth}(x/L,$   
512  $t)$ , around the ventral-most location. For each time point,  $\tilde{t}$ ,  $Dl_{smooth}(x/L, \tilde{t})$  was  
513 normalized by dividing by its maximal value at  $\tilde{t}$ . Peak sharpness was then calculated as the  
514 standard deviation divided by the mean, in percent, of values close to the peak: within the  
515 range  $\frac{x}{L} \in [-0.1, 0.1]$ . This measure captures how different from each other are values close to  
516 the peak.

517

518

519

520

521

522

523

524

525

526

527

528

## 529 **References**

- 530 Bahar Halpern, K., Itzkovitz, S., 2016. Single molecule approaches for quantifying  
531 transcription and degradation rates in intact mammalian tissues. *Methods* 98, 134-142.
- 532 Barkai, N., Shilo, B.Z., 2009. Robust generation and decoding of morphogen gradients. *Cold*  
533 *Spring Harb Perspect Biol* 1, a001990.
- 534 Ben-Zvi, D., Fainsod, A., Shilo, B.Z., Barkai, N., 2014. Scaling of dorsal-ventral patterning in  
535 the *Xenopus laevis* embryo. *Bioessays* 36, 151-156.
- 536 Ben-Zvi, D., Shilo, B.Z., Fainsod, A., Barkai, N., 2008. Scaling of the BMP activation gradient  
537 in *Xenopus* embryos. *Nature* 453, 1205-1211.
- 538 Bothma, J.P., Garcia, H.G., Ng, S., Perry, M.W., Gregor, T., Levine, M., 2015. Enhancer  
539 additivity and non-additivity are determined by enhancer strength in the *Drosophila* embryo.  
540 *Elife* 4.
- 541 Cho, Y.S., Stevens, L.M., Sieverman, K.J., Nguyen, J., Stein, D., 2012. A ventrally localized  
542 protease in the *Drosophila* egg controls embryo dorsoventral polarity. *Curr Biol* 22, 1013-  
543 1018.
- 544 DeLotto, R., DeLotto, Y., Steward, R., Lippincott-Schwartz, J., 2007. Nucleocytoplasmic  
545 shuttling mediates the dynamic maintenance of nuclear Dorsal levels during *Drosophila*  
546 embryogenesis. *Development* 134, 4233-4241.
- 547 DeLotto, Y., DeLotto, R., 1998. Proteolytic processing of the *Drosophila* Spatzle protein by  
548 easter generates a dimeric NGF-like molecule with ventralising activity. *Mech Dev* 72, 141-  
549 148.
- 550 di Pietro, F., Bellaiche, Y., 2018. Actin Network Discussion during Mitotic Pseudo-Furrowing.  
551 *Dev Cell* 45, 539-541.
- 552 Dorfman, R., Shilo, B.Z., 2001. Biphasic activation of the BMP pathway patterns the  
553 *Drosophila* embryonic dorsal region. *Development* 128, 965-972.
- 554 Eldar, A., Dorfman, R., Weiss, D., Ashe, H., Shilo, B.Z., Barkai, N., 2002. Robustness of the  
555 BMP morphogen gradient in *Drosophila* embryonic patterning. *Nature* 419, 304-308.
- 556 Gabay, L., Seger, R., Shilo, B.Z., 1997. MAP kinase in situ activation atlas during *Drosophila*  
557 embryogenesis. *Development* 124, 3535-3541.
- 558 Green, J.B., Sharpe, J., 2015. Positional information and reaction-diffusion: two big ideas in  
559 developmental biology combine. *Development* 142, 1203-1211.
- 560 Haskel-Ittah, M., Ben-Zvi, D., Branski-Arieli, M., Schejter, E.D., Shilo, B.Z., Barkai, N., 2012.  
561 Self-organized shuttling: generating sharp dorsoventral polarity in the early *Drosophila*  
562 embryo. *Cell* 150, 1016-1028.
- 563 Heemskerk, I., Streichan, S.J., 2015. Tissue cartography: compressing bio-image data by  
564 dimensional reduction. *Nat Methods* 12, 1139-1142.
- 565 Heer, N.C., Miller, P.W., Chanet, S., Stoop, N., Dunkel, J., Martin, A.C., 2017. Actomyosin-  
566 based tissue folding requires a multicellular myosin gradient. *Development* 144, 1876-1886.
- 567 Helman, A., Lim, B., Andreu, M.J., Kim, Y., Shestkin, T., Lu, H., Jimenez, G., Shvartsman,  
568 S.Y., Paroush, Z., 2012. RTK signaling modulates the Dorsal gradient. *Development* 139,  
569 3032-3039.
- 570 Herr, P., Hausmann, G., Basler, K., 2012. WNT secretion and signalling in human disease.  
571 *Trends Mol Med* 18, 483-493.

- 572 Kanodia, J.S., Rikhy, R., Kim, Y., Lund, V.K., DeLotto, R., Lippincott-Schwartz, J.,  
573 Shvartsman, S.Y., 2009. Dynamics of the Dorsal morphogen gradient. *Proc Natl Acad Sci U S*  
574 *A* 106, 21707-21712.
- 575 Kolsch, V., Seher, T., Fernandez-Ballester, G.J., Serrano, L., Leptin, M., 2007. Control of  
576 *Drosophila* gastrulation by apical localization of adherens junctions and RhoGEF2. *Science*  
577 315, 384-386.
- 578 Lagha, M., Bothma, J.P., Esposito, E., Ng, S., Stefanik, L., Tsui, C., Johnston, J., Chen, K.,  
579 Gilmour, D.S., Zeitlinger, J., Levine, M.S., 2013. Paused Pol II coordinates tissue  
580 morphogenesis in the *Drosophila* embryo. *Cell* 153, 976-987.
- 581 Lapraz, F., Besnardeau, L., Lepage, T., 2009. Patterning of the dorsal-ventral axis in  
582 echinoderms: insights into the evolution of the BMP-chordin signaling network. *PLoS Biol* 7,  
583 e1000248.
- 584 Lecuit, T., Brook, W.J., Ng, M., Calleja, M., Sun, H., Cohen, S.M., 1996. Two distinct  
585 mechanisms for long-range patterning by Decapentaplegic in the *Drosophila* wing. *Nature* 381,  
586 387-393.
- 587 Liberman, L.M., Reeves, G.T., Stathopoulos, A., 2009. Quantitative imaging of the Dorsal  
588 nuclear gradient reveals limitations to threshold-dependent patterning in *Drosophila*. *Proc Natl*  
589 *Acad Sci U S A* 106, 22317-22322.
- 590 Lim, B., Levine, M., Yamazaki, Y., 2017. Transcriptional Pre-patterning of *Drosophila*  
591 Gastrulation. *Curr Biol* 27, 610.
- 592 Morisato, D., Anderson, K.V., 1994. The spatzle gene encodes a component of the  
593 extracellular signaling pathway establishing the dorsal-ventral pattern of the *Drosophila*  
594 embryo. *Cell* 76, 677-688.
- 595 Nellen, D., Burke, R., Struhl, G., Basler, K., 1996. Direct and long-range action of a DPP  
596 morphogen gradient. *Cell* 85, 357-368.
- 597 Rahimi, N., Averbukh, I., Haskel-Ittah, M., Degani, N., Schejter, E.D., Barkai, N., Shilo, B.Z.,  
598 2016. A WntD-Dependent Integral Feedback Loop Attenuates Variability in *Drosophila* Toll  
599 Signaling. *Dev Cell* 36, 401-414.
- 600 Reversade, B., De Robertis, E.M., 2005. Regulation of ADMP and BMP2/4/7 at opposite  
601 embryonic poles generates a self-regulating morphogenetic field. *Cell* 123, 1147-1160.
- 602 Rusch, J., Levine, M., 1996. Threshold responses to the dorsal regulatory gradient and the  
603 subdivision of primary tissue territories in the *Drosophila* embryo. *Curr Opin Genet Dev* 6,  
604 416-423.
- 605 Schneider, D.S., Jin, Y., Morisato, D., Anderson, K.V., 1994. A processed form of the Spatzle  
606 protein defines dorsal-ventral polarity in the *Drosophila* embryo. *Development* 120, 1243-  
607 1250.
- 608 Shilo, B.Z., Barkai, N., 2017. Buffering Global Variability of Morphogen Gradients. *Dev Cell*  
609 40, 429-438.
- 610 Shilo, B.Z., Haskel-Ittah, M., Ben-Zvi, D., Schejter, E.D., Barkai, N., 2013. Creating gradients  
611 by morphogen shuttling. *Trends Genet* 29, 339-347.
- 612 Shimmi, O., Umulis, D., Othmer, H., O'Connor, M.B., 2005. Facilitated transport of a  
613 Dpp/Scw heterodimer by Sog/Tsg leads to robust patterning of the *Drosophila* blastoderm  
614 embryo. *Cell* 120, 873-886.
- 615 Stein, D., Roth, S., Vogelsang, E., Nusslein-Volhard, C., 1991. The polarity of the dorsoventral  
616 axis in the *Drosophila* embryo is defined by an extracellular signal. *Cell* 65, 725-735.



- 617 Tanimoto, H., Itoh, S., ten Dijke, P., Tabata, T., 2000. Hedgehog creates a gradient of DPP  
618 activity in *Drosophila* wing imaginal discs. *Mol Cell* 5, 59-71.
- 619 Trcek, T., Lionnet, T., Shroff, H., Lehmann, R., 2017. mRNA quantification using single-  
620 molecule FISH in *Drosophila* embryos. *Nat Protoc* 12, 1326-1348.
- 621 van der Zee, M., Stockhammer, O., von Levetzow, C., Nunes da Fonseca, R., Roth, S., 2006.  
622 Sog/Chordin is required for ventral-to-dorsal Dpp/BMP transport and head formation in a short  
623 germ insect. *Proc Natl Acad Sci U S A* 103, 16307-16312.
- 624 Wang, Y.C., Ferguson, E.L., 2005. Spatial bistability of Dpp-receptor interactions during  
625 *Drosophila* dorsal-ventral patterning. *Nature* 434, 229-234.
- 626 Weber, A.N., Tauszig-Delamasure, S., Hoffmann, J.A., Lelievre, E., Gascan, H., Ray, K.P.,  
627 Morse, M.A., Imler, J.L., Gay, N.J., 2003. Binding of the *Drosophila* cytokine Spatzle to Toll  
628 is direct and establishes signaling. *Nat Immunol* 4, 794-800.
- 629 Wolpert, L., 1971. Positional information and pattern formation. *Curr Top Dev Biol* 6, 183-  
630 224.
- 631 Wotton, K.R., Alcaine-Colet, A., Jaeger, J., Jimenez-Guri, E., 2017. Non-canonical  
632 dorsoventral patterning in the moth midge *Clogmia albipunctata*. *Evodevo* 8, 20.
- 633 Zhang, Y., Yu, J.C., Jiang, T., Fernandez-Gonzalez, R., Harris, T.J.C., 2018. Collision of  
634 Expanding Actin Caps with Actomyosin Borders for Cortical Bending and Mitotic Rounding  
635 in a Syncytium. *Dev Cell* 45, 551-564 e554.
- 636

637



## 638 **Figure Legends**

639 **Figure 1. Dynamics of Dl-nuclear localization.** (A) Schematic cross-section of an early  
640 embryo: Spz is distributed in a sharp gradient along the D-V axis within the peri-vitaline  
641 space. Spz binding to the Toll receptor triggers a signaling cascade, culminating in a gradient  
642 of nuclear Dl with a sharp ventral peak. Generation of the Spz sharp gradient was proposed to  
643 employ a self-organized shuttling mechanism (Haskel-Ittah et al., 2012). (B) A frame from a  
644 Light Sheet time-lapse movie following the dynamics of endogenously expressed Dl-GFP in  
645 the entire embryo. The gradient can be visualized already at NC 12, it is lost during nuclear  
646 divisions and is re-generated at the onset of each nuclear cycle. (C) Each frame of the 3D Light  
647 Sheet scan was projected to a 2D map using the ImSAnE tool (Heemskerk and Streichan,  
648 2015). Here, the 2D projection of the frame from B is shown. The quantification of Dl-GFP  
649 intensity in the nuclei along the D-V axis at 1 min intervals was carried out on nuclei inside the  
650 dashed frame. This region, which is close to the middle of the A-P axis, is not distorted by the  
651 2D projection (See Methods). (D) Dl-GFP intensity, plotted as function of relative location  
652 along the D-V axis (relative location axis  $x/L$  is defined as location divided by embryo  
653 circumference (See Methods)). A curve is shown for each time point for NC 12, 13 and 14 for  
654 the same *wt* embryo. Each Dl-GFP intensity curve was smoothed and normalized by the  
655 maximal value attained during NC14 (See Methods). Time points are one minute apart, going  
656 from earliest time points in blue to the latest in red. Duration of each NC in minutes is  
657 indicated above the plot.

658 **Figure 2. Measured nuclear Dl dynamics during NC14 indicates ongoing shuttling.** (A-D)  
659 Measured nuclear Dl temporal dynamics for a *wt* embryo, time points are color coded and are  
660 one minute apart. (E-P) Simulations of nuclear Dl temporal dynamics (See SI). (E-H)  
661 Diffusion model: nuclear Dl localization induced by Spz binding the Toll receptor, with Spz  
662 diffusing out of a wide source while being degraded. (I-L) Constant external gradient model:  
663 nuclear Dl localization induced by Spz binding the Toll receptor, with a Spz gradient that is  
664 constant in time. (M-P) Full model: nuclear Dl localization induced by Spz binding the Toll  
665 receptor, with shuttling of Spz. (A,E,I,M) Nuclear Dl levels in [a.u], plotted as function of  
666 relative location along the D-V axis. A curve is shown for each time point, time points are

667 color coded. (B,F,J,N) Nuclear D1 levels at specific locations along the D-V axis, as function of  
668 time. Nuclear localizations along the D-V axis are color coded. Each location's curve was  
669 normalized by its own maximal value. (C,G,K,O) Nuclear D1 temporal derivative at specific  
670 locations along the D-V axis, as function of time. Each location's curve was normalized by its  
671 own maximal value. (D,H,L,P) Nuclear D1 temporal derivative at specific locations along the  
672 D-V axis, as function of nuclear D1. Each location's curve was normalized by its own maximal  
673 value. Color codes for the location of nuclei along the D-V axis and for the temporal dynamics  
674 are shown.

675 **Figure 3. Shuttling dynamics are impaired in the absence of WntD.** (A) A scheme showing  
676 the integral feed-back loop between D1 and WntD. *wntD* expression is restricted to the  
677 posterior side of the embryo (purple) and is induced by D1. (B) A scheme showing WntD  
678 binding to Fz4, and restricting the binding of Spz to the Toll receptor. (C,F) Simulations of D1  
679 temporal dynamics in the full model for a *wt* (C) and *wntD* mutant (F) embryo (See SI). Time  
680 points are color coded. For the *wntD* mutant, the double peak is more prominent and does not  
681 fully converge resulting in a flat peak. (D,G) Measured D1 temporal dynamics for a *wt* (D) and  
682 *wntD* mutant (G) embryo (See Methods). Time points are color coded, and are one minute  
683 apart. As predicted by the model, the *wntD* mutant exhibits less efficient shuttling leading to a  
684 more prominent double peak, which does not fully converge, resulting in a flat peak. (E,H) Log  
685 of D1-GFP intensity temporal dynamics at selected locations along the D-V axis for a *wt* (E)  
686 and *wntD* mutant (H) embryo from panels D,G. Locations are color coded. Measured values  
687 were background subtracted and smoothed in time (See Methods). The flat peak of the *wntD*  
688 mutant embryo results in very similar D1 values over time for the four ventral most curves,  
689 while in the *wt* embryo each curve attains a different final value and has different dynamics.  
690 (I-J) Peak sharpness over time (calculated as std/mean in % of values close to the peak, See  
691 Methods) in a population of *wt* embryos (black) and *wntD* mutant embryos (red) during NC 13  
692 (I) and NC14 (J). Bold lines indicate population mean and surrounding color indicates standard  
693 error. Number of embryos in each population is indicated in plot. Sharpness in the *wt* population  
694 increases over time to a value significantly higher than the *wntD* mutant population. The *wntD*  
695 mutant population exhibits an initial increase in peak sharpness due to the prominent double  
696 peak, followed by a decrease due to peak flattening. (K) Scheme showing the global

697 attenuation effect of WntD on Toll availability, leading to redirection of active ligand binding  
698 towards more ventral positions. (L) In *wntD* mutants additional Toll receptors become  
699 available, leading to increased ligand binding in lateral regions, generating a flatter peak of  
700 signaling.

701 **Figure 4. An enlarged ventral furrow is formed in the absence of WntD.** Snapshots of  
702 cross-sections of a *wt* (A-D) vs. *wntD* mutant embryo (E-F) expressing DI-GFP, showing the  
703 ventral nuclei during NC 14. Time in NC 14 (in minutes) is indicated. When the first sign of  
704 invagination appeared, the most lateral nuclei still displaying positional change were marked  
705 (yellow). Working backwards in the movies allowed an accurate count of the nuclei between  
706 them prior to invagination.

707 **Figure 5. Dynamics of *wntD* transcription.** (A) Schematic representation of the *wntD*::MS2  
708 reporter. The 1.2 kb regulatory region upstream of the *wntD* coding sequence drives the  
709 expression of Fhos-RH with 24 MS2 repeats located at its 5' end. (B) Light Sheet live imaging  
710 of the transcriptional activity of the *wntD* promoter enables a quantitative analysis of its  
711 dynamics. Embryos express His:RFP which marks nuclei in red and the transcriptional activity  
712 is indicated by the green signal. (B-F) A constant reduction in the number of nuclei expressing  
713 *wntD* is observed from NC12 onwards, such that by NC 14 no transcription is observed. Since  
714 the *wntD* promoter responds to the level of DI, we assume that this reduction reflects the  
715 attenuating activity of WntD.

716 **Figure 6. Graded accumulation of T48 transcripts is driven by the dynamics of DI-  
717 nuclear entry.** (A) Time lapse images from the beginning of NC 14, showing the dynamics of  
718 the onset of *T48* transcription in a *wt* embryo, followed by *T48*::MS2. Nuclei displaying  
719 transcription were highlighted in yellow. Arrows mark the edges of the domain at each time  
720 point. (B) Quantification of the data in (A). Times are color-coded according to (A), Y axis  
721 represents the normalized number of transcription start sites (TSSs) along the A-P axis, X axis  
722 represents the position along the D-V axis. (C) The intensity of *T48*::MS2 signal for nuclei  
723 across the D-V axis at 33 min. Once *T48* transcription is initiated, it progresses at comparable  
724 rates in all nuclei. (D,E) Single molecule FISH for *T48* showing the intensity of transcription  
725 and the number of active nuclei across the region expressing *T48*. Nuclei are marked by DAPI

726 (blue) and *T48* probe in red. Once transcription is initiated it proceeds at a similar rate by all  
727 nuclei, and the number of nuclei expressing *T48* in ventral and ventro-lateral regions is  
728 comparable. (F) The ventral *T48* expression domain, arrows mark TSs. (G) Quantification of  
729 smFISH data: Number of *T48* mRNA molecules in black bars, and TSs intensity corresponding  
730 to transcription rate in blue diamonds.

731 **Figure 7. Dynamics of Spz shuttling establishes pattern.** The shuttling mechanism operates  
732 within a wide domain D-V predefined by Pipe expression during oogenesis. Initially, a double-  
733 peak distribution of the Spz morphogen in the peri-vitelline space is observed. In *wt* embryos  
734 shuttling operates efficiently to concentrate the Spz morphogen to a single sharp peak. The  
735 dynamics of the Dl gradient are utilized by the embryo to induce graded accumulation of *T48*  
736 transcripts, which facilitate recruitment of RhoGEF2 and ultimately Rho1 and actomyosin, to  
737 drive apical constriction of invaginating mesodermal cells. Loss of WntD renders shuttling less  
738 efficient, leading to a flattened peak of morphogen distribution. This may result in impaired  
739 distribution of *T48* transcripts and therefore in a broader gastrulation furrow.

740

741 Figure 1

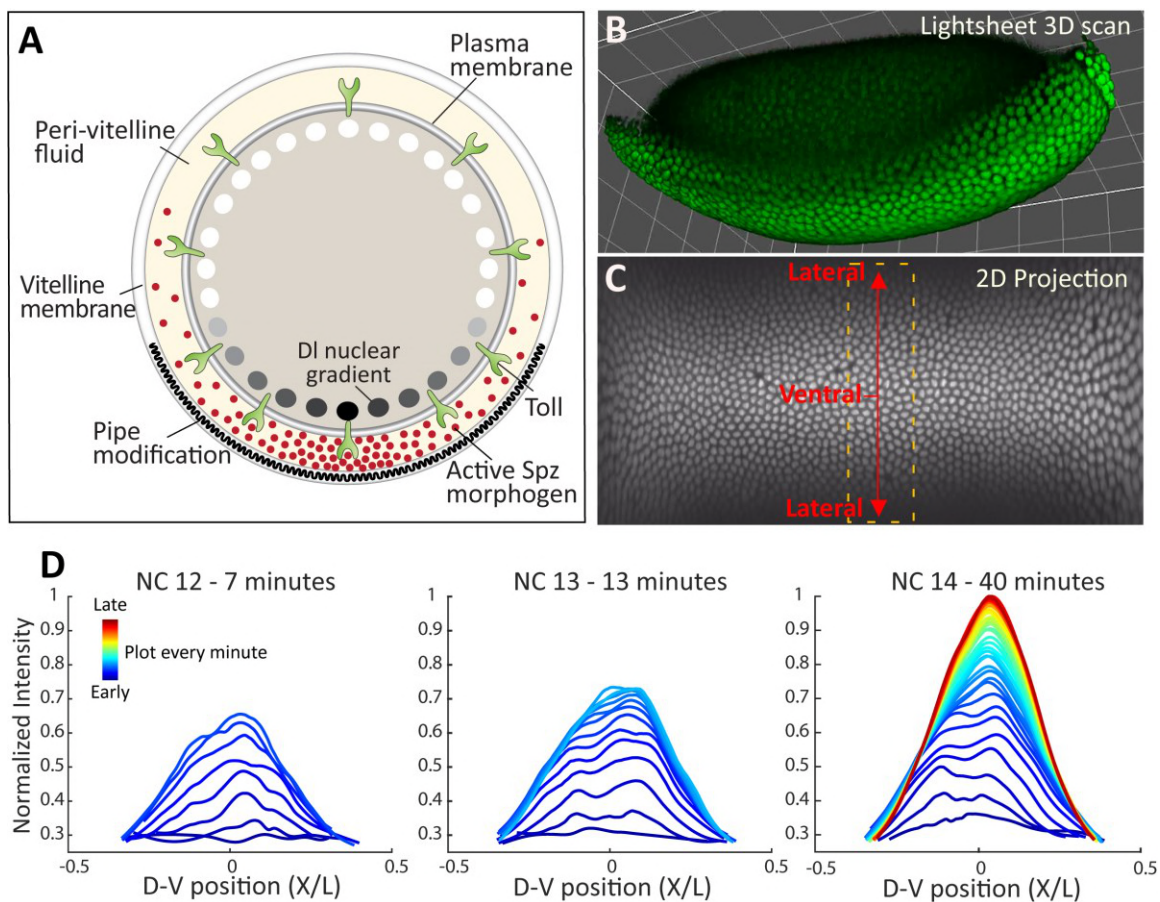

742

743

744



745 Figure 2

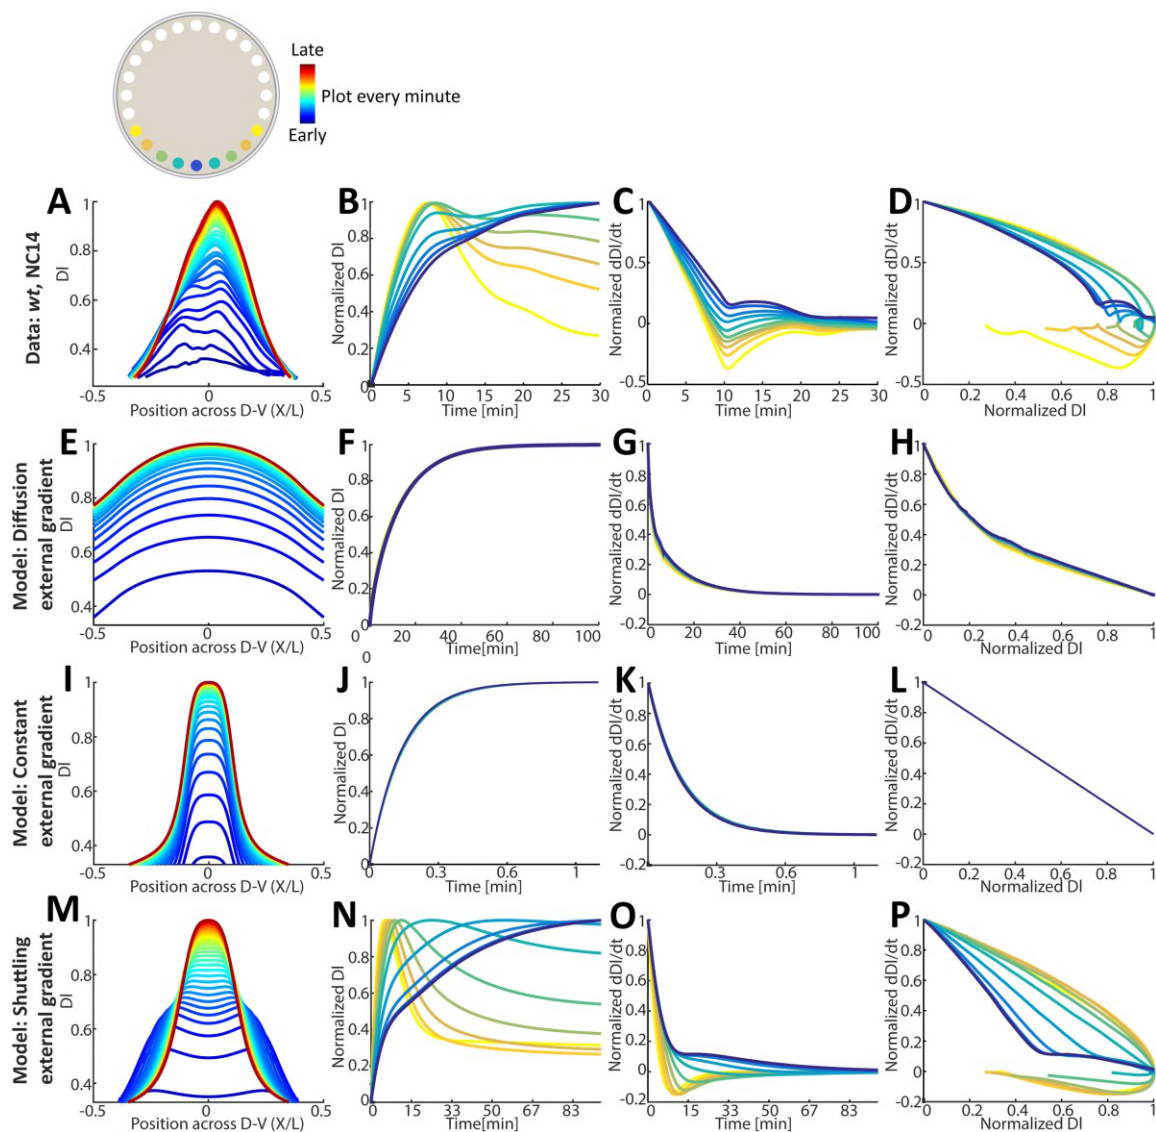

746

747

748 Figure 3

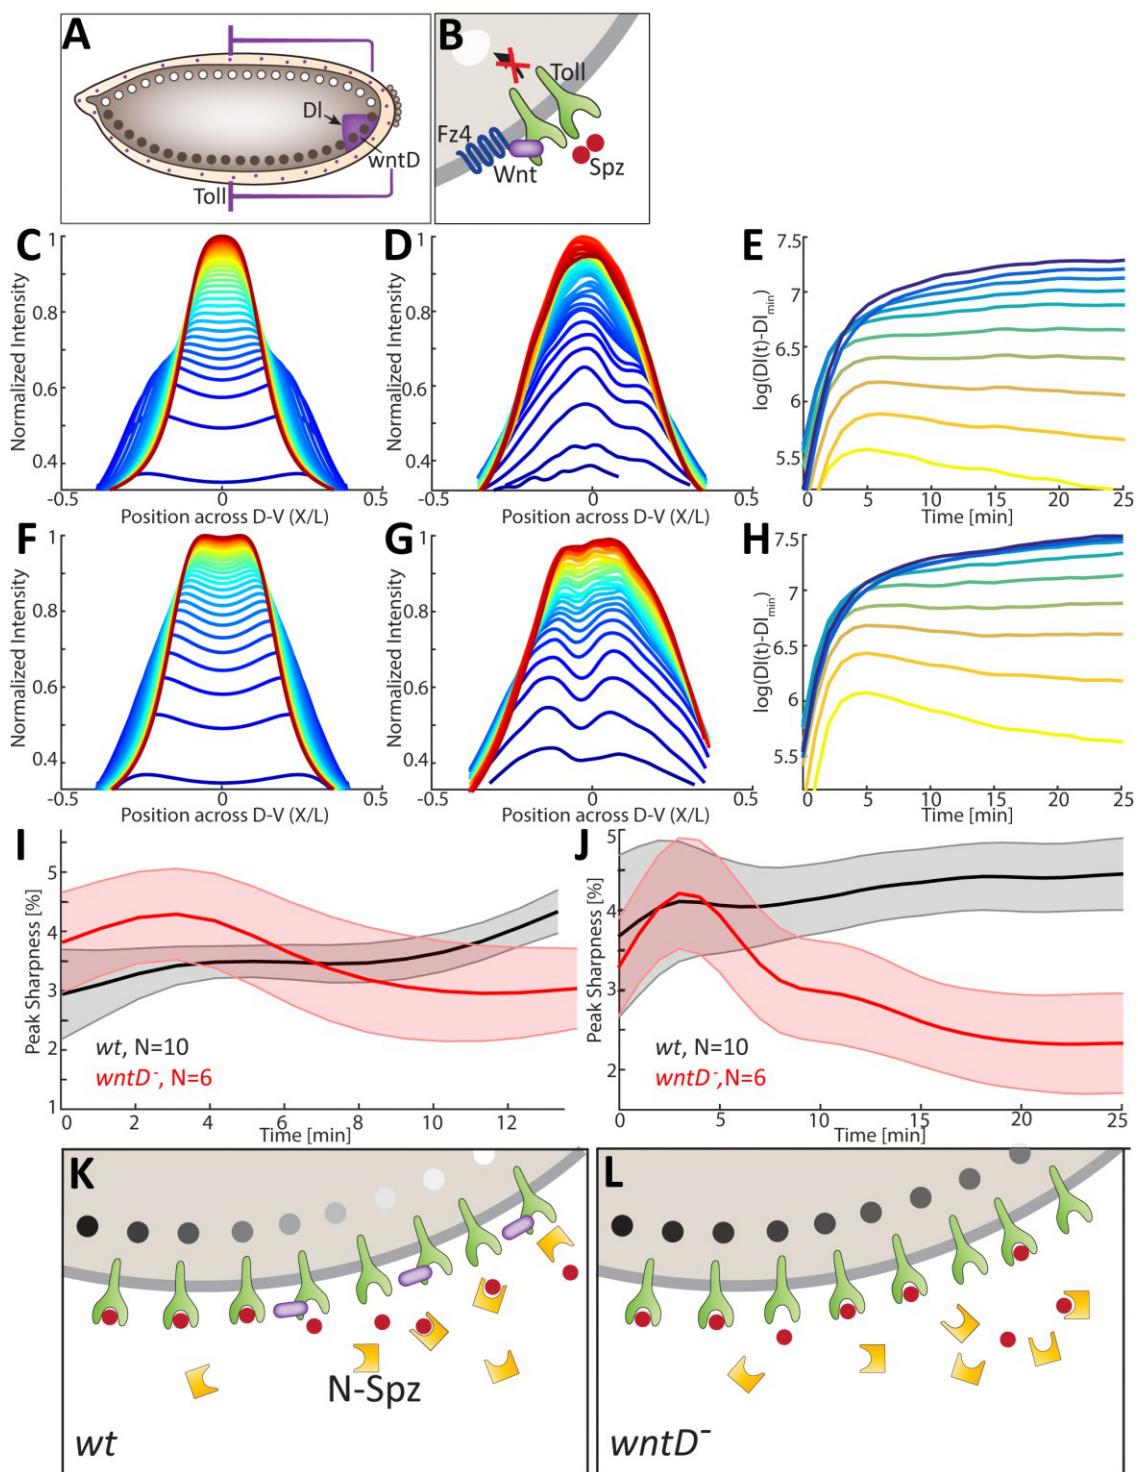

749

750



751 Figure 4

752

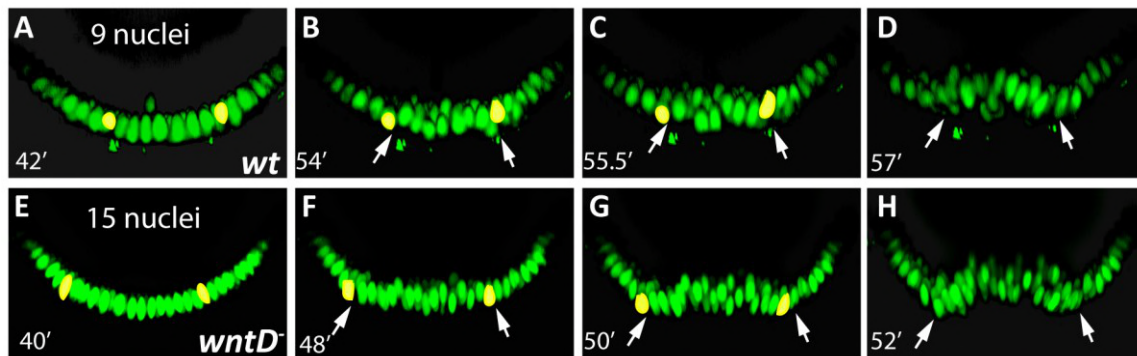

753

754

755 Figure 5

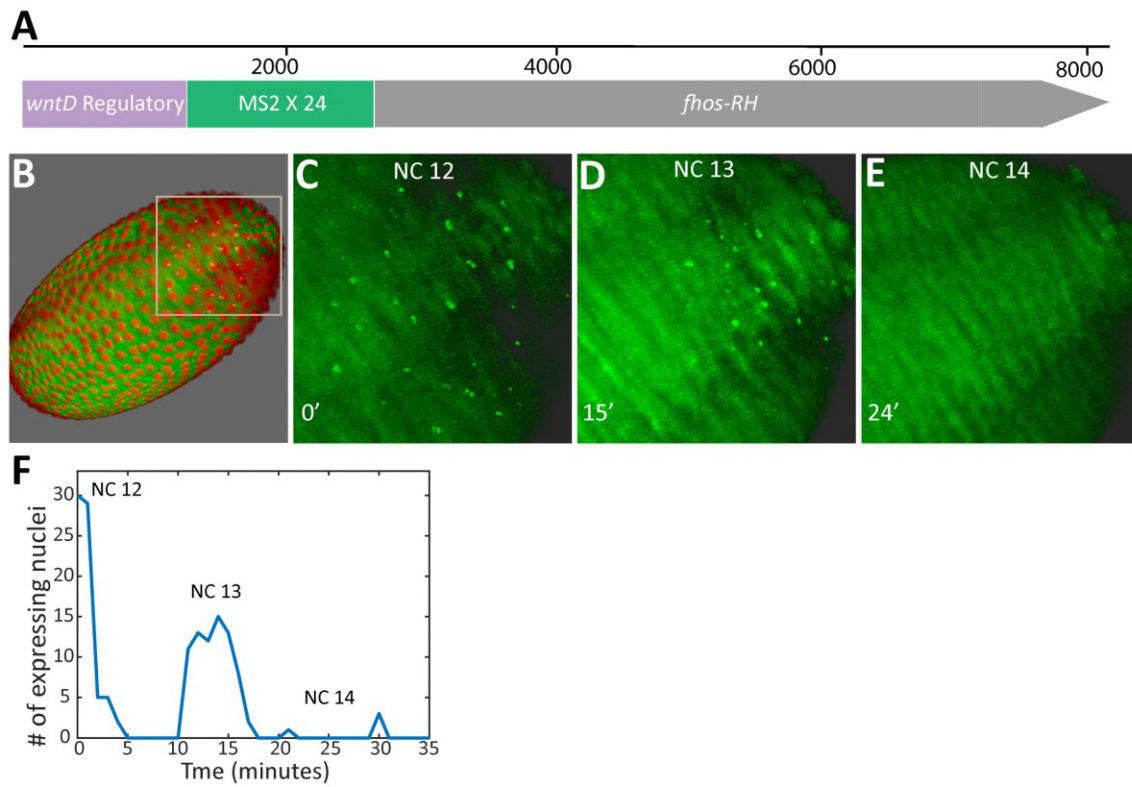

756

757

758 Figure 6

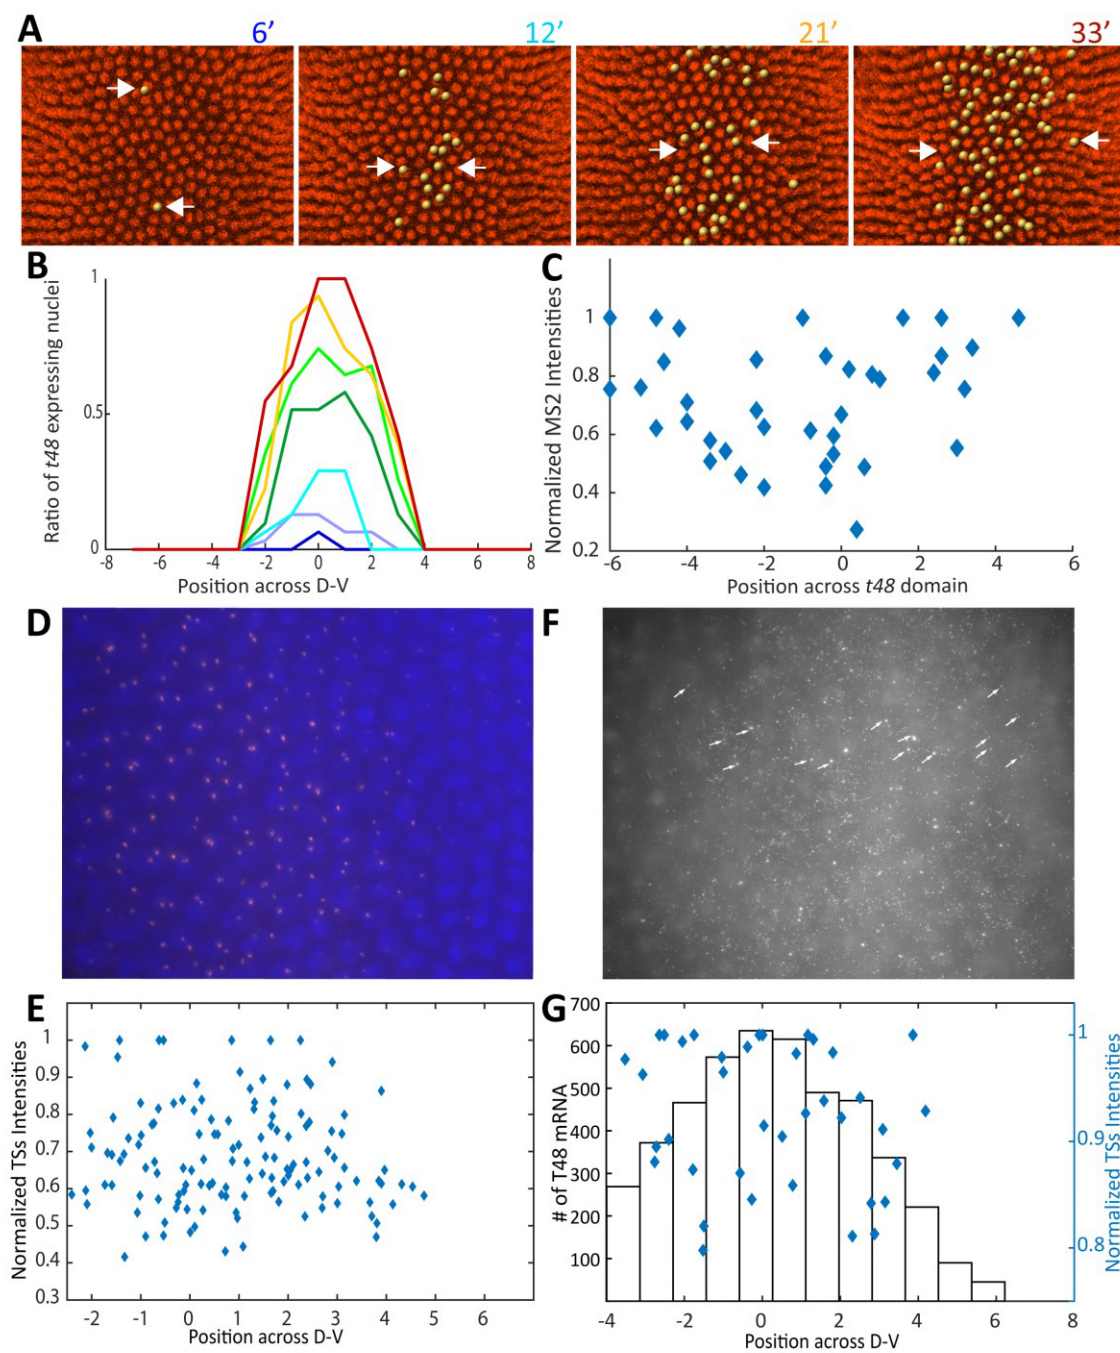

759

760

761 Figure 7

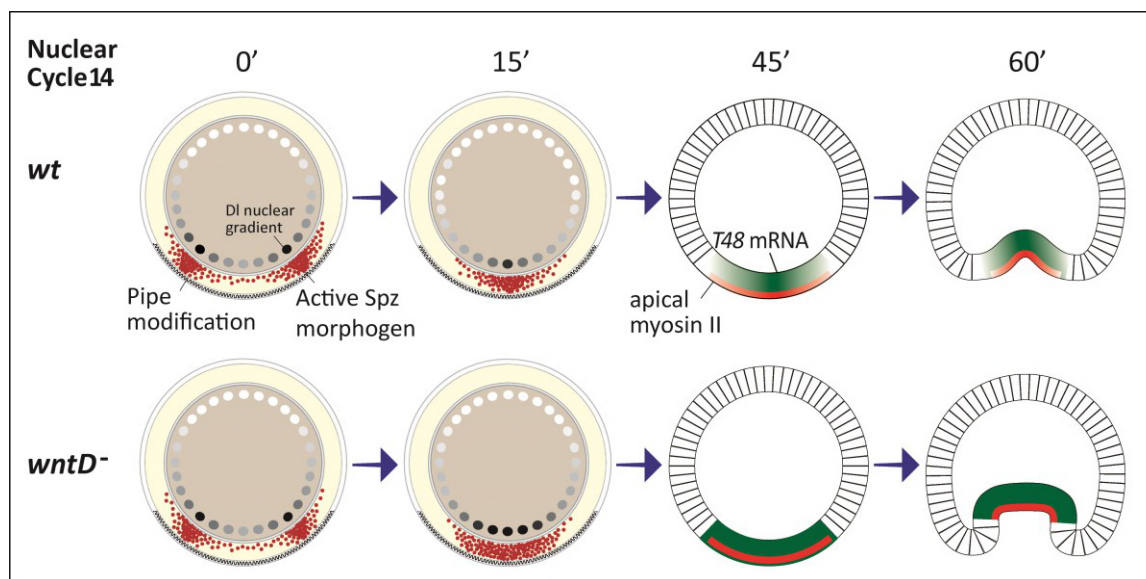

762

763

764 **Dynamics of Spaetzle morphogen shuttling in the *Drosophila***  
765 **embryo shapes pattern**

766 **Supplemental Information**

767 **Contents**

|     |                                                             |    |
|-----|-------------------------------------------------------------|----|
| 768 | Supplemental Movies, figures and Tables .....               | 35 |
| 769 | Mathematical model.....                                     | 39 |
| 770 | Full model equations.....                                   | 40 |
| 771 | Full model parameters.....                                  | 41 |
| 772 | Constant external gradient model .....                      | 41 |
| 773 | Naïve diffusion model.....                                  | 42 |
| 774 | Shuttling parameters effect on double peak prominence ..... | 42 |
| 775 | References.....                                             | 43 |
| 776 |                                                             |    |
| 777 |                                                             |    |



## 778 Supplemental Movies, figures and Tables

779

780 **Movie 1** - A Light Sheet time-lapse movie following the dynamics of endogenously expressed DI-GFP in the entire embryo.

781 The nuclear DI gradient can be seen in nuclei at the ventral side (bottom) already at NC 12, it is lost during nuclear divisions

782 and is re-generated at the onset of each nuclear cycle.

783 **Movie 2** - A frame by frame 2D projection of movie 1 done using the ImSAnE tool (Heemskerk and Streichan, 2015). DI-GFP

784 appears in grey.

785 **Movie 3** - Time lapse of DI-GFP intensity data for the area inside the dashed frame in Figure 1C. Each circular marker in the

786 movie shows raw, non smoothed DI-GFP intensity in a single nucleus. Nuclei were segmented from the corresponding frames

787 of movie 2 (See Methods).

788

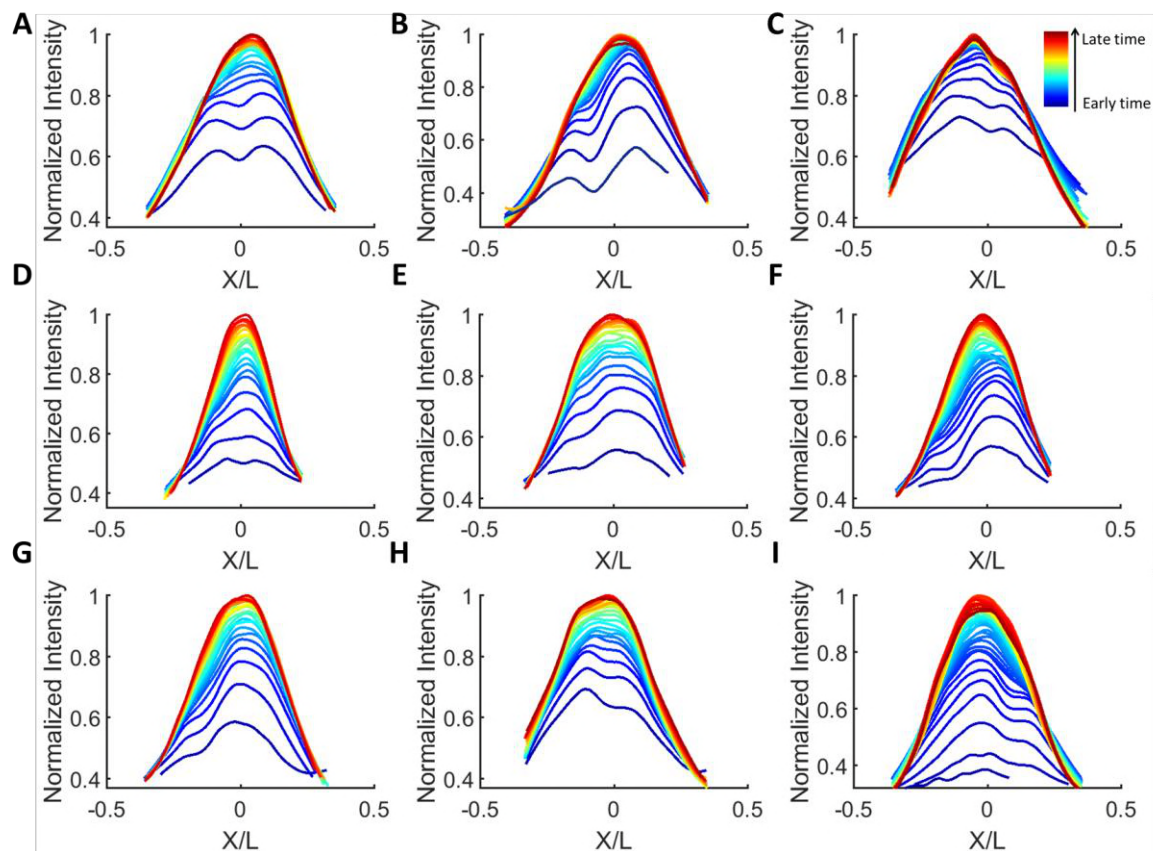

789

790 **Figure S1 – DI temporal dynamics during NC14 in *wt* embryos.** DI-GFP intensity, plotted as function of relative location

791 along the DV axis, relative location axis  $x/L$  is defined as location divided by embryo circumference (See Methods). A curve is

792 shown for each time point during NC14 for 9 *wt* embryos. Each DI-GFP intensity curve was smoothed and normalized by

793 the maximal value attained during NC14 (See Methods). Time points are 1.5 minutes apart for (A-H) and 1 minute apart for I,

794 going from earliest time points in blue to the latest in red. All embryos exhibit shuttling signatures: lateral overshoots and

795 converging double peaks.

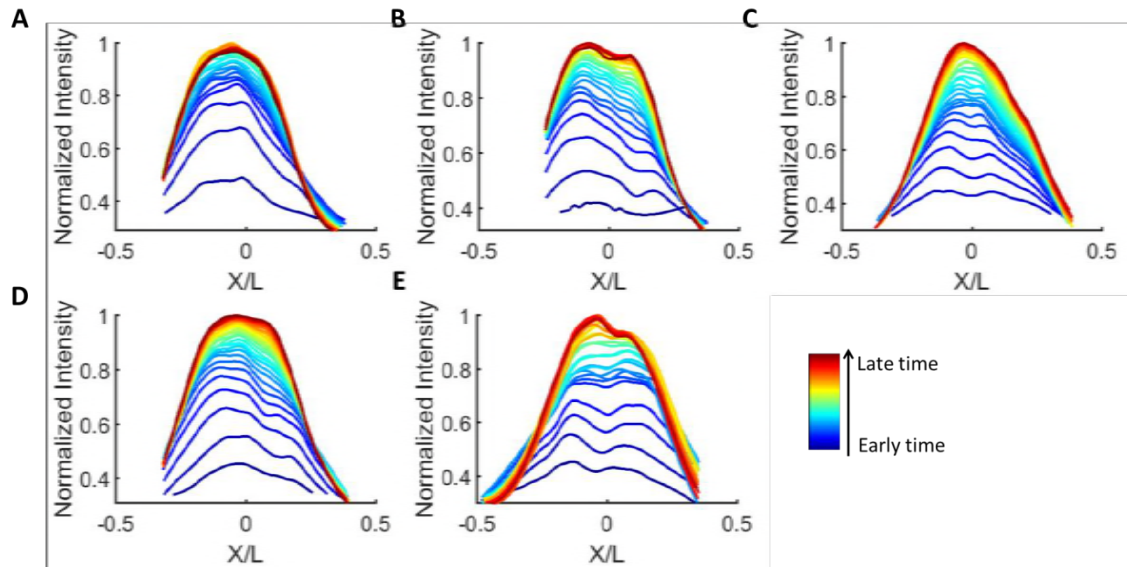

796

797

798

799

800

801

802

**Figure S2 - DI temporal dynamics during NC14 in *wntD*<sup>-/-</sup> embryos.** DI-GFP intensity, plotted as function of relative location along the DV axis, relative location axis  $x/L$  is defined as location divided by embryo circumference (See Methods). A curve is shown for each time point during NC14 for 5 *wntD*<sup>-/-</sup> embryos. Each DI-GFP intensity curve was smoothed and normalized by the maximal value attained during NC14 (See Methods). Time points are 1.5 minutes apart for, going from earliest time points in blue to the latest in red. All embryos exhibit shuttling signatures: lateral overshoots and double peaks flattening over time.

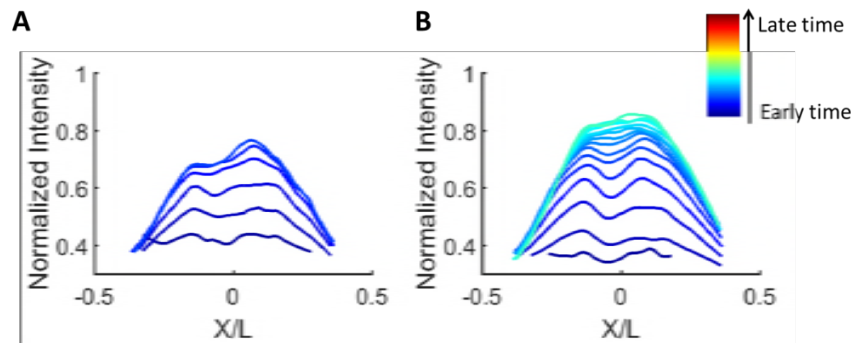

803

804

805

806

807

808

809

**Figure S3 - DI temporal dynamics during NC12-13 in a *wntD*<sup>-/-</sup> embryo.** DI-GFP intensity, plotted as function of relative location along the DV axis, relative location axis  $x/L$  is defined as location divided by embryo circumference (See Methods). A curve is shown for each time point during NC12 (A) and NC13 (B) for the *wntD*<sup>-/-</sup> embryo presented in Figure 3E. Each DI-GFP intensity curve was smoothed and normalized by the maximal value attained during NC14 (See Methods, Figure 3E). Time points are 1 minute apart for, going from earliest time points in blue to the latest in red.



810 **Table S1 : Parameters table for full model, WT values**

| #  | Parameter     | Units type  | Meaning                                                        | Value in a.u | Units             | Value in units |
|----|---------------|-------------|----------------------------------------------------------------|--------------|-------------------|----------------|
| 1  | $K_{rec}$     | $t^{-1}$    | Toll receptor recycling rate                                   | 0.07         | $sec^{-1}$        | 0.007          |
| 2  | $K_{end}$     | $t^{-1}$    | Toll receptor endocytosis rate                                 | 1            | $sec^{-1}$        | 0.1            |
| 3  | $\lambda$     | $t^{-1}$    | NCSpz* cleavage rate                                           | 4.2          | $sec^{-1}$        | 0.42           |
| 4  | $\alpha_N$    | $t^{-1}$    | NSpz degradation rate                                          | 0.0011       | $sec^{-1}$        | 0.00011        |
| 5  | $\alpha_c$    | $t^{-1}$    | CSpz degradation rate                                          | 0.0014       | $sec^{-1}$        | 0.00014        |
| 6  | $\alpha_{Nc}$ | $t^{-1}$    | NCSpz degradation rate                                         | 0.0016       | $sec^{-1}$        | 0.00016        |
| 7  | $K_{on,c}$    | $t^{-1}C$   | CSpz binding to Toll                                           | 0.3          | $\mu Msec^{-1}$   | 0.0013         |
| 8  | $K_{off,c}$   | $t^{-1}C$   | CSpz un-binding from Toll                                      | 1.12         | $\mu Msec^{-1}$   | 0.0049         |
| 9  | $K_{on}$      | $t^{-1}C$   | NCSpz binding to Toll                                          | 0.008        | $\mu Msec^{-1}$   | 3.2e-5         |
| 10 | $K_{off}$     | $t^{-1}C$   | NCSpz un-binding from Toll                                     | 0.1          | $\mu Msec^{-1}$   | 4.33e-04       |
| 11 | $\eta_0$      | $t^{-1}C$   | NCSpz activation rate                                          | 0.22         | $\mu Msec^{-1}$   | 9.68e-4        |
| 12 | $K_{bind}$    | $t^{-1}C$   | CSpz binding rate to NSpz                                      | 7            | $\mu Msec^{-1}$   | 0.0308         |
| 13 | $K_{split}$   | $t^{-1}$    | NC-T1 splitting rate to C-T1 and 2*N-Spz , on Toll             | 10           | $sec^{-1}$        | 1              |
| 14 | $D_{NC}$      | $x^2t^{-1}$ | NCSpz diffusion coefficient                                    | 0.1186       | $\mu m^2sec^{-1}$ | 118.6          |
| 15 | $D_N$         | $x^2t^{-1}$ | NSpz diffusion coefficient                                     | 0.0055       | $\mu m^2sec^{-1}$ | 55             |
| 16 | $D_{NC*}$     | $x^2t^{-1}$ | NCSpz* diffusion coefficient                                   | 0.745        | $\mu m^2sec^{-1}$ | 745            |
| 17 | $T_{tot}$     | $C$         | Total Toll level                                               | 5.625        | $\mu M$           | 0.25           |
| 18 | $D_W$         | $x^2t^{-1}$ | WntD diffusion coefficient                                     | 0.5          | $\mu m^2sec^{-1}$ | 500            |
| 19 | $\alpha_w$    | $t^{-1}$    | WntD degradation rate                                          | 0.001        | $sec^{-1}$        | 1.4e-5         |
| 20 | $\beta_w$     | $t^{-1}C$   | WntD production rate                                           | 0.1          | $\mu Msec^{-1}$   | 4.4e-4         |
| 21 | $K_w$         | $C^{n_w}$   | $K_D$ of WntD production as a function of signaling            | 9e-10        | $\mu M^{n_w}$     | 4.7e-30        |
| 22 | $n_w$         | -           | Hill coefficient of WntD production as a function of signaling | 15           | -                 | 15             |
| 23 | $L$           | $x$         | Length of tissue                                               | 2            | $\mu m$           | 250            |

|    |              |                 |                                                                              |      |                     |                      |
|----|--------------|-----------------|------------------------------------------------------------------------------|------|---------------------|----------------------|
| 24 | $X_{pipe}$   | %               | % of L below which a point $\vec{x} = (x, y, z) \in pipe\ domain$            | 40   | %                   | 40                   |
| 25 | $X_{WntD}$   | %               | % of L above which a point $\vec{x} = (x, y, z) \in WntD\ producing\ domain$ | 25   | %                   | 25                   |
| 26 | $W_{lower}$  | %               | Maximal lowering of Tl property by WntD                                      | 60   | %                   | 60                   |
| 27 | $W_{Tr}$     | $C^{n_{lower}}$ | $K_D$ of WntD lowering receptor property                                     | 5    | $\mu M^{n_{lower}}$ | 0.01                 |
| 28 | $n_{lower}$  | -               | Hill coefficient of WntD lowering receptor property                          | 2    | -                   | 2                    |
| 29 | $T$          | $t$             | # of discrete time points the simulation was run                             | 600  | $sec$               | 6000<br>(~1.5 hours) |
| 30 | $K_{DL,in}$  | $t^{-1}C$       | Rate of DI entry into the nucleus                                            | 0.07 | $\mu Msec^{-1}$     | 2.8e-04              |
| 31 | $K_{DL,out}$ | $t^{-1}C$       | Rate of DI exit from the nucleus                                             | 2    | $\mu Msec^{-1}$     | 0.008                |
| 32 | $DI_0$       | $C$             | Initial DI concentration in the nuclei                                       | 1e-4 | $\mu M$             | 4.4e-06              |
| 33 | $DI_{tot}$   | $C$             | Total amount of DI                                                           | 5    | $\mu M$             | 0.22                 |

811

812

813

## 814 **Mathematical model**

815 Our full model describes how the Spz gradient is formed by shuttling, induces the nuclear  
816 localization of Dl and the negative feedback between WntD and Dorsal which maintains the  
817 gradients robustness (Rahimi et al., 2016). To this end, we extend the model from our previous  
818 paper (Rahimi et al., 2016) to include the nuclear localization of Dorsal. Also, we used a  
819 different mechanism by which WntD contracts the Spz gradient: instead of competing with the  
820 ligand for binding the Toll receptor, we assume here that WntD “crowds” the Toll receptors  
821 immediate environment by binding its own receptor Frizzled4 and limiting the access of Spz to  
822 Toll. This increases the chances of free ligand binding the shuttling molecule instead of the  
823 receptor and therefore enhances shuttling. This “crowding” of Toll has an additional affect:  
824 stabilizing the ligand which succeeded in binding, which also makes shuttling more efficient.  
825 The governing set of reaction-diffusion equations of our model is given below: **eqn. 1** defines  
826 the temporal dynamics of freely diffusing WntD. The terms of the equation by order of  
827 appearance describe: WntD diffusion, WntD degradation, WntD production which depends on  
828 nuclear Dorsal. This last term is the induction part of InC as WntD production is positively  
829 regulated by signaling. The WntD producing zone is restricted and is defined in the embryo by  
830 the Torso signaling border. In the simulations we define this zone using the model parameter  
831  $X_{WntD}$ : WntD production is only allowed for points posterior to  $X_{WntD}$ . **Eqn. 2** defines the  
832 nonlinear saturating function  $R_w(\vec{x}, t)$  through which WntD changes the properties of the Toll  
833 receptor: the rate at which ligands bind and unbind from it. **Eqn. 3** defines the temporal  
834 dynamics of free Toll receptors. This equation introduces the following constraint: the total  
835 amount of Toll receptors (free, bound by ligand and endocytosed) is constant and equals  $T_{tot}$ .  
836 **Equations 4-10** are the self-organized shuttling model (SOSH) equations as appear in (Haskel-  
837 Ittah et al., 2012), we’ll review SOSH and the equations briefly. The SOSH mechanism  
838 depends on the versatility of the *Spz* protein. The separate inhibitor domain N-Spz and  
839 activating region of *Spz*, C-Spz, generated after cleavage of the NC-Spz precursor (**eqn. 4**), can  
840 interact with each other in three different modes. These modes facilitate a process of “self-  
841 organized shuttling”, where the active ligand C-Spz is shuttled and concentrated at the ventral-  
842 most region giving rise to the sharp activation gradient of *Toll*. Equations 5-7 describe the  
843 shuttling of the active C-Spz ligand (which cannot diffuse on its own) by the N-Spz inhibitor  
844 when bound together as the NC-Spz\* complex. Signaling occurs when C-Spz bound to Toll

845 undergoes endocytosis (**eqns. 5,8,10**). Toll receptors undergo recycling back to the membrane  
 846 after endocytosis and the total concentration of Toll is constant (**eqns. 10,3** respectively). The  
 847 C-Spz ligand and N-Spz inhibitor are products of NC-Spz complex separation when bound to  
 848 the Toll receptor (**eqn. 4,9**). NC-Spz is also capable of inducing Toll endocytosis when binding  
 849 it and thus contributing to signaling (**eqn. 9**) but signaling through NC-Spz happens at a much  
 850 lower rate than C-Spz mediated signaling. **Equations 11-12** describe the induction of Dorsal  
 851 nuclear localization by Toll signaling. **Eqn. 11** introduces the following constraint: the total  
 852 amount of Dorsal (Nuclear-  $Dl_{in}$  and cytoplasmic-  $Dl_{out}$ ) is constant and equals  $Dl_{tot}$ . The  
 853 meaning of the different parameters and their units are summarized in Table S1. This set of  
 854 equations was solved numerically in 1D using a standard MATLAB PDE solver.

### 855 Full model equations

$$856 \quad (1) \frac{\partial[W]}{\partial t} = D_W \nabla^2[W] - \alpha_w[W] + \beta(\vec{x}) \frac{[Dl_{in}]^{n_w}}{K_w + [Dl_{in}]^{n_w}}$$

$$857 \quad \beta(\vec{x}) = \begin{cases} \text{if } x > X_{wntD} \rightarrow \vec{x} = (x, y, z) \in wntD \text{ expression zone,} & \beta_w \\ \text{else,} & 0 \end{cases}$$

$$858 \quad (2) R_w(\vec{x}, t) = W_{lower} + (1 - W_{lower}) \frac{W_{Tr}}{W_{Tr} + [W(\vec{x}, t)]^{n_{lower}}}$$

859

$$(3) T_{tot} = [Tl] + [CSpz - Tl] + [NCSpz - Tl] + [Tl_{end}] \rightarrow$$

$$860 \quad [Tl]_{(\vec{x}, t)} = T_{tot} - [CSpz - Tl] - [NCSpz - Tl] + [Tl_{end}]$$

$$861 \quad (4) \frac{\partial[NCSpz]}{\partial t} =$$

$$862 \quad D_{NC} \nabla^2[NCSpz] - \alpha_{NC}[NCSpz] + \eta(\vec{x}) - R_w K_{on}[Tl][NCSpz] + R_w K_{off}[NCSpz - Tl]$$

$$\eta(\vec{x}) = \begin{cases} \text{if } \vec{x} = (x, y, z) \in \text{pipe domain,} & \eta_0 \\ \text{else,} & 0 \end{cases}$$

$$863 \quad (5) \frac{\partial[CSpz]}{\partial t} =$$

$$864 \quad -\alpha_c[CSpz] - R_w K_{on,c}[Tl][CSpz] + R_w K_{off,c}[CSpz - Tl] - K_{bind}[NSpz][CSpz] +$$

$$865 \quad K_{split}[NCSpz - Tl] + \frac{\lambda\eta(\vec{x})}{\eta_0}[NCSpz *]$$

$$866 \quad (6) \frac{\partial[NSpz]}{\partial t} = D_{NC} \nabla^2[NSpz] - \alpha_{NC}[NSpz] - K_{bind}[NSpz][CSpz] + 2K_{split}[NCSpz - Tl]$$

$$867 \quad (7) \frac{\partial[NCSpz*]}{\partial t} = D_{NC*} \nabla^2[NCSpz *] - \frac{\lambda\eta(\vec{x})}{\eta_0}[NCSpz *] + K_{bind}[NSpz][CSpz]$$

$$(8) \frac{\partial [CSpz - Tl]}{\partial t} = R_w [Tl] [CSpz] - R_w K_{off,c} [CSpz - Tl] + K_{split} [NCSpz - Tl] - K_{end} [CSpz - Tl]$$

$$(9) \frac{\partial [NCSpz - Tl]}{\partial t} = R_w K_{on} [Tl] [NCSpz] - (R_w K_{off} + K_{split} + K_{end}) [NCSpz - Tl]$$

$$(10) \frac{\partial [Tl_{end}]}{\partial t} = K_{end} ([CSpz - Tl] + [NCSpz - Tl]) - K_{rec} [Tl_{end}]$$

$$(11) [Dl_{Tot}] = [Dl_{in}] + [Dl_{out}]$$

$$(12) \frac{\partial [Dl_{in}]}{\partial t} = K_{Dl,in} [Tl_{end}] [Dl_{out}] - K_{Dl,out} [Dl_{in}]$$

871

## 872 Full model parameters

873 When choosing parameters, we relied on our previous papers where SOSH (Haskel-Ittah et al.,  
 874 2012) and InC (Rahimi et al., 2016) were previously analyzed. For the SOSH WT parameters  
 875 we in this work, we used the SOSH parameter values described in Table S5 of (Haskel-Ittah et  
 876 al., 2012) with slight alterations to better resemble our experimental data. Values for WntD  
 877 related parameters (diffusion, degradation, and production rates) were based on our previous  
 878 paper (Rahimi et al., 2016). The addition of Dorsal nuclear localization (eqns. 11-12)  
 879 introduced new dorsal related parameters, which were selected to resemble similar parameters  
 880 in the model (for example, the total concentration of Dorsal is similar to that of Toll). For the  
 881 simulation of WntD mutants, model equations were solved with the WntD production rate set  
 882 to zero.

## 883 Constant external gradient model

884 In order to simulate only Dorsal nuclear localization induced by a constant Toll signaling  
 885 profile, the following set of equations was solved:

$$(13) \frac{\partial [Tl_{end}]}{\partial t} = 0, \quad [Tl_{end}] = Tl_{end}^{final}(X)$$

$$(14) [Dl_{Tot}] = [Dl_{in}] + [Dl_{out}]$$

$$(15) \frac{\partial [Dl_{in}]}{\partial t} = K_{Dl,in} [Tl_{end}] [Dl_{out}] - K_{Dl,out} [Dl_{in}]$$

886 The constant external gradient,  $Tl_{end}^{final}$ , was selected to be the sharp Toll signaling profile  
 887  $[Tl_{end}]$  at the last time point for the simulation of the full model (eqns 1-12). Parameter values  
 888 according to Table S1.

### 889 Naïve diffusion model

890 This model includes a single ligand,  $NCSpz$ , which is produced throughout the pipe domain  
 891 (eqn. 17). The ligand diffuses and is degraded (eqn. 17). It binds the Toll receptor (eqns.  
 892 18,16), and induces Dorsal nuclear localization (eqns. 20-21). This model is described by the  
 893 following equations:

$$(16) T_{tot} = [Tl] + [NCSpz - Tl] + [Tl_{end}] \rightarrow$$

$$894 [Tl]_{(\vec{x},t)} = T_{tot} - [NCSpz - Tl] + [Tl_{end}]$$

$$895 (17) \frac{\partial [NCSpz]}{\partial t} = D_{NC} \nabla^2 [NCSpz] - \alpha_{NC} [NCSpz] + \eta(\vec{x}) - K_{on}[Tl][NCSpz] + K_{off}[NCSpz -$$

$$896 Tl]$$

$$\eta(\vec{x}) = \begin{cases} \text{if } \vec{x} = (x, y, z) \in \text{pipe domain,} & \eta_0 \\ \text{else,} & 0 \end{cases}$$

$$897 (18) \frac{\partial [NCSpz - Tl]}{\partial t} = K_{on}[Tl][NCSpz] - (K_{off} + K_{end})[NCSpz - Tl]$$

$$(19) \frac{\partial [Tl_{end}]}{\partial t} = K_{end}([NCSpz - Tl]) - K_{rec}[Tl_{end}]$$

$$(20) [Dl_{Tot}] = [Dl_{in}] + [Dl_{out}]$$

$$(21) \frac{\partial [Dl_{in}]}{\partial t} = K_{Dl,in}[Tl_{end}][Dl_{out}] - K_{Dl,out}[Dl_{in}]$$

898 Parameter values according to Table S1. See further analytical and numerical analysis for the  
 899 sharpness and robustness of the gradient in this model in (Haskel-Ittah et al., 2012).

### 900 Shuttling parameters effect on double peak prominence

901 The prominence of the converging double peak feature in the shuttling model depends on  
 902 model parameters which control the mean path the shuttling complex travels ventrally  
 903 before being cleaved, relative to the length of the source (pipe domain). This mean path is  
 904 influenced by several parameters, mainly tissue absolute length  $L$  (when maintaining the  
 905 source as 40% of absolute length), changing source length directly by assuming the pipe  
 906 domain is smaller or larger than 40% of the circumference, cleavage rate of the shuttling  
 907 complex  $\lambda$ , diffusion coefficient of the shuttling complex  $D_{NC*}$ . For a sufficiently large ratio



908 between the mean path and  $L$ , no double peak will be observed. Lowering this ratio  
 909 increases the prominence of the double peak. For a sufficiently small ratio, the double  
 910 peak does not converge into a single peak since the shuttling complex cannot penetrate  
 911 all the way to the ventral most. We demonstrate this by solving the full model for our WT  
 912 parameter set (Table S1), and comparing to sets where these parameters are perturbed:  
 913 decreased 2 fold and increased 2 fold:

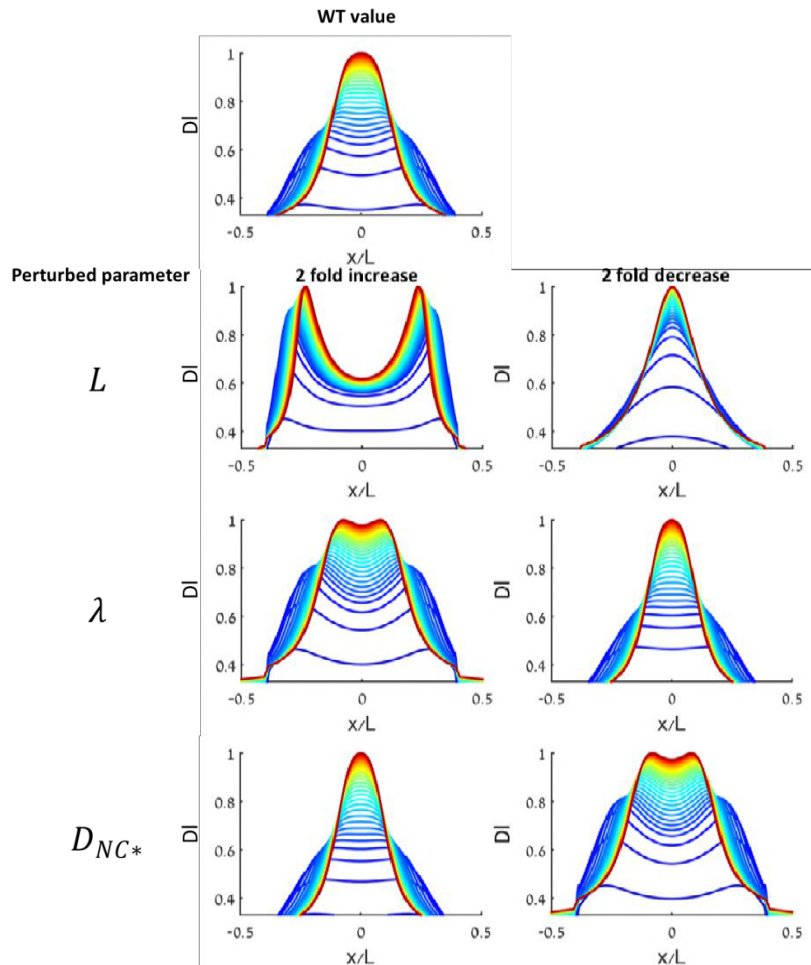

914

915 **Model Supplement Figure 1 – Perturbations to shuttling complex parameters modulate double peak prominence.**

## 916 **References**

917 Haskel-Ittah, M., Ben-Zvi, D., Branski-Arieli, M., Schejter, E.D., Shilo, B.Z., Barkai, N., 2012.  
 918 Self-organized shuttling: generating sharp dorsoventral polarity in the early Drosophila  
 919 embryo. Cell 150, 1016-1028.  
 920 Heemskerk, I., Streichan, S.J., 2015. Tissue cartography: compressing bio-image data by  
 921 dimensional reduction. Nat Methods 12, 1139-1142.

922 Rahimi, N., Averbukh, I., Haskel-Ittah, M., Degani, N., Schejter, E.D., Barkai, N., Shilo, B.Z.,  
923 2016. A WntD-Dependent Integral Feedback Loop Attenuates Variability in Drosophila Toll  
924 Signaling. Dev Cell 36, 401-414.  
925
